# Supplementary material
Source: PubMed Central journal article supplement (PMC2909450)
Supplement: NIHMS217822-supplement-01.pdf [file NIHMS217822-supplement-01.pdf]

## Inventory of Supplementary Information

**Figure S1.** Comparison of the SecYEG wild-type and mutant structures referred to in Figure 1.

**Figure S2.** Location of H-Bonding Clusters referred to Figure 2.

**Figure S3.** Examples of the H-bond interactions in *T. maritima* corresponding to those of *M. jannaschii* referred to in Figure 2.

**Figure S4.** Examples of the H-bond interactions in *T. thermophilus* corresponding to those of *M. jannaschii* referred to in Figure 2.

**Figure S5.** Alignment of Sec61p/SecY sequences from *T. thermophilus*, *M. jannaschii*, *E. coli*, *T. maritima*, and *S. cerevisiae* referred to in Figure 3 and Figures S3 and S4.

**Figure S6.** Frequency of analysis for selected H-bonding amino acids in SecY from archaea referred to in Figure 3.

**Figure S7.** Frequency of analysis for selected H-bonding amino acids in SecY from bacteria referred to in Figure 3.

**Figure S8.** Frequency of analysis for selected H-bonding amino acids in SecY from eukarya referred to in Figure 3.

**Figure S9.** Frequency of analysis for selected H-bonding amino acids in SecE from archaea referred to in Figure 3.

**Figure S10.** Frequency of analysis for selected H-bonding amino acids in SecE from bacteria referred to in Figure 3.

**Figure S11.** Frequency of analysis for selected H-bonding amino acids in SecE from eukarya referred to in Figure 3.

**Figure S12.** Completed SecY sequence alignments for archaea referred to in Figure 3.

**Table S1.** Summary of H-bonding analysis for the cytoplasmic half of wild-type SecY (Sim 1) referred to in Figure 2.

**Table S2.** Summary of H-bonding analysis for the periplasmic half of wild-type SecY (Sim 1) referred to in Figure 2.

**Table S3.** Known mutation effects of H-bonding amino acids relevant to Figures 4-9.

**Table S4.** The organism names and Pfam access codes for all SecY archaeal sequence alignments of Figure S12.

**Complete sequence alignments** for 78 archaea, 865 bacteria, and 187 eukarya are available in HTML format from our web site:

[http://blanco.biomol.uci.edu/download/Bondar\\_SecYE\\_align.zip](http://blanco.biomol.uci.edu/download/Bondar_SecYE_align.zip)

## Supplementary Information

### Dynamics of SecY Translocons with Translocation-Defective Mutations

Ana-Nicoleta Bondar<sup>1,2</sup>, Coral Muñoz del Val<sup>3</sup>, J. Alfredo Freites<sup>1,2,4</sup>,

Douglas J. Tobias<sup>2,4</sup> and Stephen H. White<sup>1,2</sup>

<sup>1</sup>Department of Physiology and Biophysics and the <sup>2</sup>Center for Biomembrane Systems,

University of California at Irvine, Irvine, CA 92697-4560

<sup>3</sup>Department of Computer Science and Artificial Intelligence

University of Granada, Granada, E-18071, Spain

<sup>4</sup>Department of Chemistry and <sup>5</sup>Institute for Surface and Interface Science, University of  
California at Irvine  
Irvine, CA 92697-2025

address correspondence to [stephen.white@uci.edu](mailto:stephen.white@uci.edu)

## Contents

**Figure S1.** Comparison of the SecYEG wild-type and mutant structures referred to in Figure 1.

**Figure S2.** Location of H-Bonding Clusters referred to Figure 2.

**Figure S3.** Examples of the H-bond interactions in *T. maritima* corresponding to those of *M. jannaschii* referred to in Figure 2.

**Figure S4.** Examples of the H-bond interactions in *T. thermophilus* corresponding to those of *M. jannaschii* referred to in Figure 2.

**Figure S5.** Alignment of Sec61p/SecY sequences from *T. thermophilus*, *M. jannaschii*, *E. coli*, *T. maritima*, and *S. cerevisiae* referred to in Figure 3 and Figures S3 and S4.

**Figure S6.** Frequency of analysis for selected H-bonding amino acids in SecY from archaea referred to in Figure 3.

**Figure S7.** Frequency of analysis for selected H-bonding amino acids in SecY from bacteria referred to in Figure 3.

**Figure S8.** Frequency of analysis for selected H-bonding amino acids in SecY from eukarya referred to in Figure 3.

**Figure S9.** Frequency of analysis for selected H-bonding amino acids in SecE from archaea referred to in Figure 3.

**Figure S10.** Frequency of analysis for selected H-bonding amino acids in SecE from bacteria referred to in Figure 3.

**Figure S11.** Frequency of analysis for selected H-bonding amino acids in SecE from eukarya referred to in Figure 3.

**Figure S12.** Completed SecY sequence alignments for archaea referred to in Figure 3.

**Table S1.** Summary of H-bonding analysis for the cytoplasmic half of wild-type SecY (Sim 1) referred to in Figure 2.

**Table S2.** Summary of H-bonding analysis for the periplasmic half of wild-type SecY (Sim 1) referred to in Figure 2.

**Table S3.** Known mutation effects of H-bonding amino acids referred to in Figure 3, and relevant to Figures 4-9.

**Table S4.** The organism names and Pfam access codes for all SecY archaeal sequence alignments of Figure S12.

**Complete sequence alignments** for 63 archaea, 865 bacteria, and 187 eukarya are available in HTML format from our web site:

[http://blanco.biomol.uci.edu/download/Bondar\\_SecYE\\_align.zip](http://blanco.biomol.uci.edu/download/Bondar_SecYE_align.zip)

**Figure S1.** Comparison of the SecYEG wild-type and mutant structures referred to in Figure 1. Overlap between the SecY mutant structures and wild-type SecY, and rmsd of the mutant structures relative to the starting crystal structure ( $C\alpha$  rmsd, in Å) for K250E (A; Sim2), T72V/T80V/R104A (B; Sim3), L406K (C, Sim4), and E336R (D, Sim5). Wild-type SecYEG is shown with SecY green, SecE purple, and Sec $\beta$  blue. For the mutant translocons, SecE and Sec $\beta$  are shown in transparent purple and transparent blue, respectively. Mutant SecY is depicted as follows: K250E - pink, T72V/T80V/R104A - cyan, L406K - orange, and E336R - gray. Mutated amino-acids are shown as surfaces. The numbers under 'Last 10ns' give the average rmsd  $\pm$  standard deviation for SecY (green), SecE (cyan), SecB (blue) and the TM region of SecY (dark orange), in Å. In the case of the wild-type Sim1 the rmsd  $\pm$  standard deviation values for SecY, SecE, SecB, and the TM region of SecY are  $3.2 \pm 0.1$  Å,  $2.4 \pm 0.2$  Å,  $1.9 \pm 0.2$  Å, and  $1.9 \pm 0.1$  Å, respectively (see Figure 1C).

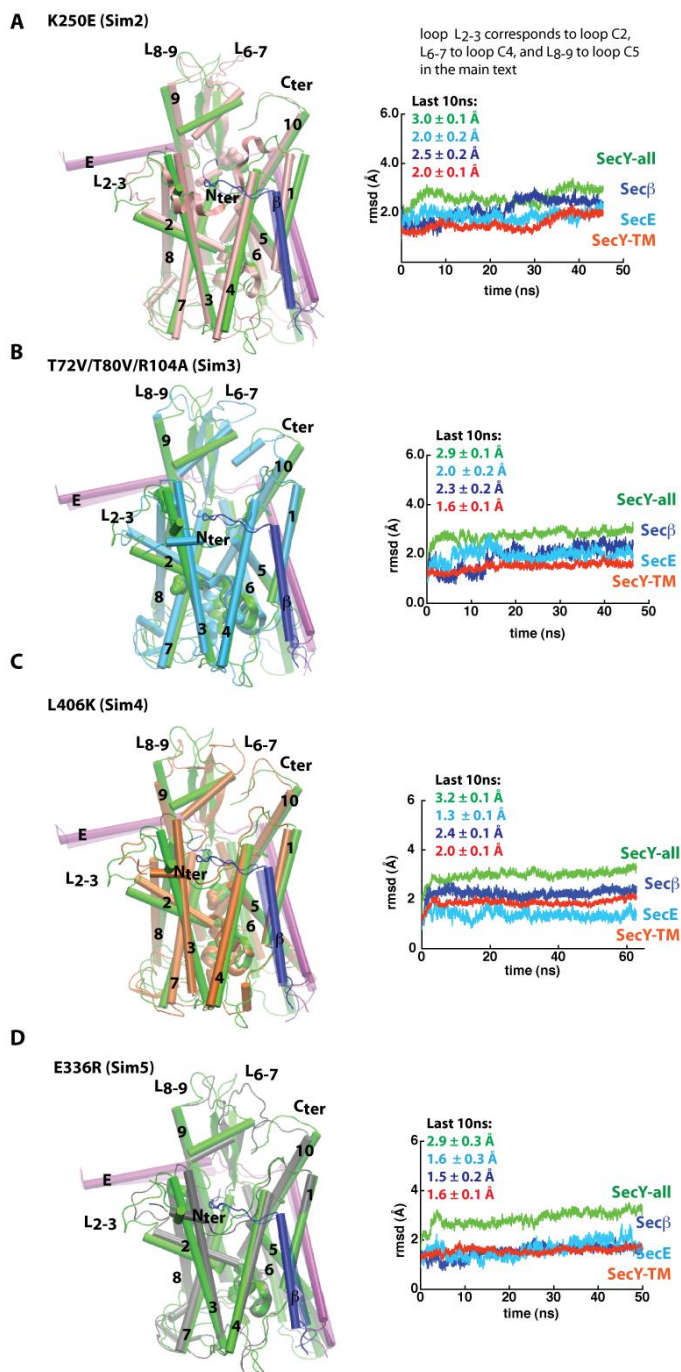

**Figure S2.** Location of H-Bonding Clusters referred to Figure 2. H-bonding amino acids of wild-type SecYEG were grouped into clusters located largely in the cytoplasmic (CP-1 to CP-6; panels A-F) and extracellular (EC-1 to EC-4; panels G-J) halves of the translocon. SecY is depicted in green, SecE in purple, and Sec $\beta$  in iceblue. H-bonding amino acids are depicted as bonds with carbon atoms in cyan, oxygen red, and nitrogen blue. For simplicity, only the backbone is shown for non-polar amino acids whose backbone groups participate in H bonding. The figures were prepared using a snapshot from the simulation on the wild-type translocon (Sim1) after ~35ns of unconstrained dynamics.

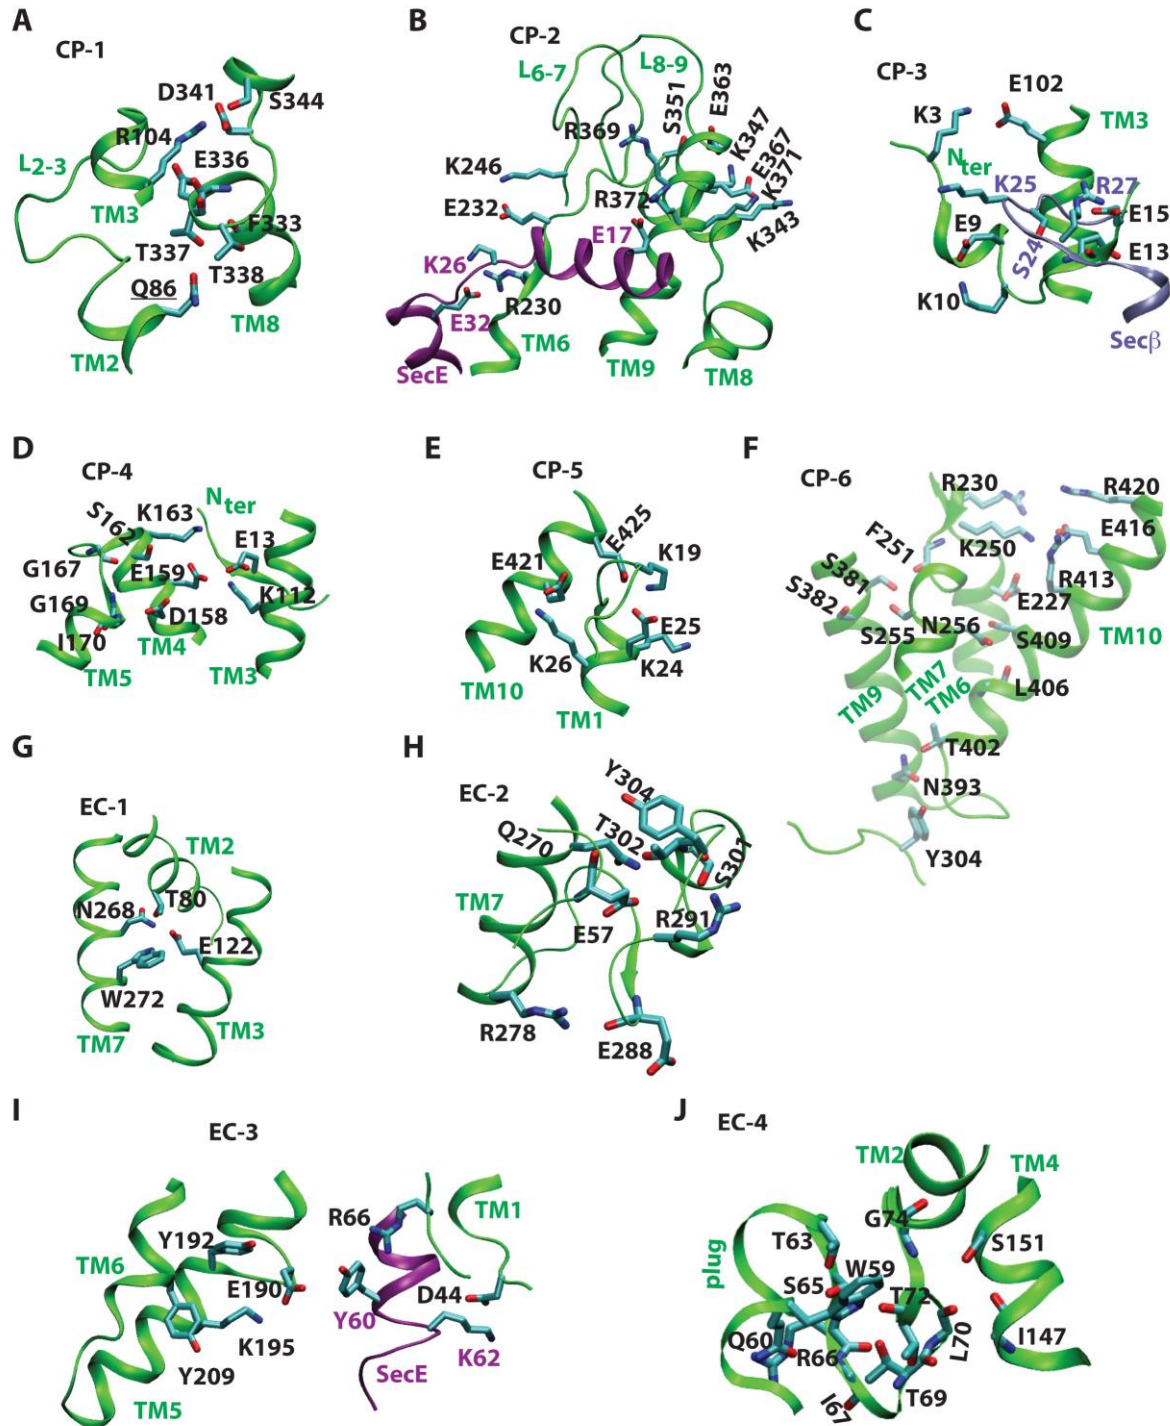

**Figure S3.** Examples of H-bond interactions in *T. maritima* corresponding to those of *M. jannaschii* referred to in Figure 2. The H-bond interactions were determined from the sequence alignments of Figure S5. The coordinates were taken from the SecYEG/SecA crystal structure 3DIN of Zimmer et al. (2008). **(A)** Amino acids T87 and Q131 (corresponding to *M. jannaschii* T80 and E122, respectively; Figure S1G) are within H-bonding distance of 3.4 Å. T83 is within H-bonding distance from S76 (3.0 Å); TM3-T124 H bonds to the carbonyl group of P84 (3.2 Å). **(B)** The TM7 amino acids S277 and S281 are not within H-bonding distance of TM2 or TM3. T168 corresponds to *M. jannaschii* S151 (see Figure S1J). T168 H bonds with the carbonyl groups of M80 and M164 (distances are 2.7 Å and 2.6 Å, respectively). The distance between the hydroxyl oxygen atoms of T79 and S163 is 3.8 Å. **(C)** On the cytoplasmic side of the *M. jannaschii* SecY, R104 and D341 H bond during the simulation on the wild type protein (see Table S1). The corresponding amino acids in *T. maritima* (R113 and D327) are located far apart from each other (the distance between the R113-CZ and D227-C $\gamma$  atoms is 16.1 Å), but the distance between R107-NH<sub>2</sub> and E330-O $\epsilon$ <sub>2</sub> is significantly shorter at 4.2 Å. Q93-O $\epsilon$ <sub>1</sub>, corresponding to *M. jannaschii* Q86 (Figure S1A), is within 5.4 Å from T318-O $\gamma$ <sub>1</sub>. Assuming that the relative orientation of D327 and E352 is correct in the 4.5 Å resolution structure of Zimmer et al. (2008), the 2.9 Å distance between the carboxyl oxygens of these two acidic amino acids could be interpreted to suggest that D327 or E352 are protonated. In *M. jannaschii*, amino acids of the N terminus participate in H-bonding interactions with TM3, TM4, and Sec $\beta$  (Figure S1C-D). In the structure of the SecYEG/SecA, these H bonds are not possible due to the N terminus being oriented towards TM10. **(D)** D158 and E159 of *M. jannaschii* participate in cluster CP-4 that also includes amino acids of TM3 and the N terminus (Figure S1D). D158 is highly conserved as Asp in archaea and eukarya (Figures S6, S8), and the D168A mutation in yeast (corresponding to *M. jannaschii* D158) affects topogenesis (Junne et al, 2007). In contrast, most bacteria have Gly at this position in the sequence (Figure S6). E159 is highly conserved in all organisms (Figures S6-S8). The *T. maritima* E176 (corresponding to *M. jannaschii* E159) could H bond with TM3-R121 -- the distance between E176-O $\epsilon$ <sub>2</sub> and R121-NH<sub>2</sub> is 4.2 Å. The distances between E176-O $\epsilon$ <sub>1</sub> and T179-OG1, and between Y85-OH and L172-O, are also longer than for a H bond (5.0 Å and 4.1 Å, respectively). **(E)** The crowded cluster of H bonds CP-6 of the *M. jannaschii* SecY involves amino acids of TM6, TM7, TM9, and TM10 (Figure S1F). *M. jannaschii* K250, whose mutation causes a *prl* phenotype in yeast (Junne et al, 2007), H bonds with TM6-E228 and TM10-E416 (Table S1). The interactions between these amino acids are greatly changed in the open structure of the *T. maritima* SecY. The distance between K264-N $\zeta$  and Q407-O $\epsilon$ <sub>1</sub> (corresponding to *M. jannaschii* K250 and E416, respectively) is 18.9 Å; likewise, the distance between K264-N $\zeta$  and Q234-O $\epsilon$ <sub>1</sub> (Q234 corresponds to *M. jannaschii* E227) is 13.1 Å. K264 H bonds instead with E237 (3.5 Å distance). It is not clear whether TM7-S277 and TM10-T393 could H bond (the distance between their hydroxyl oxygen atoms is 4.4 Å).

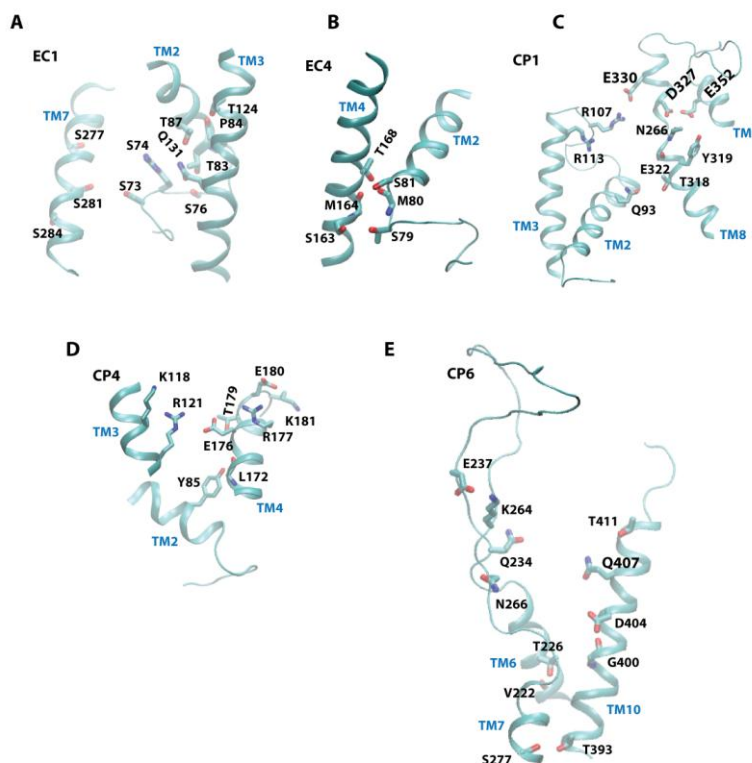



**Figure S4.** Examples of the hydrogen-bond interactions in *T. thermophilus* corresponding to those of *M. jannaschii* referred to in Figure 2. The H-bond interactions were determined from the sequence alignments of Figure S5. The coordinates were taken from the 3.2 Å SecYE-Fab crystal structure 2ZJS of Tsukazaki et al. (2008). **(A)** Similar to *T. maritima*, in *T. thermophilus* E122 is replaced by Gln (Q126). The distances between T82-O $\gamma_1$  (T82 corresponds to *M. jannaschii* T80; Figure S1G) and Q126-N $\epsilon_2$  and Q126-O $\epsilon_1$  atoms are 4.7 Å and 5.1 Å, respectively. TM7-Q282 is also not within H-bonding distance from T80 and Q126 (the distance between T82-O $\gamma_1$  and Q282-N $\epsilon_2$  is 7.9 Å). **(B)** On the cytoplasmic side, Q86 and R108, which correspond to *M. jannaschii* Q86 and R104 (Figure S1A), are not involved in H bonding with other amino acid sidechains. The distance between R108-C $\zeta$  and D332-C $\gamma$  (D332 corresponds to D341 in *M. jannaschii*) is 15.2 Å. K334 (corresponds to *M. jannaschii* K343, Figure S1 B) could be part of a H-bonding cluster with E354 (E363 in *M. jannaschii*), K358, E361. **(C)** E173 (*M. jannaschii* E159, Figure S1D) could be part of a H-bonding cluster involving N112, Q113, R109, R116, R174, E177, Y178. The distance between E173-O $\epsilon_2$  and N112-N $\delta_2$  is 3.5 Å. Because in the crystal structure of the *T. thermophilus* SecY the N terminus points away from TM3, R116 (K112 in *M. jannaschii*, Figure S1D) cannot H bond to amino acids of the N terminus; the distance between E13-C $\delta$  (*M. jannaschii* E13, Figure S1D) and R116-C $\zeta$  is 28.7 Å. E13 of the N terminus could instead salt-bridge to R422 (the distance between E13-O $\epsilon_1$  and R422-NH1 is 4.2 Å). **(D)** TM7-K265 (K250 in *M. jannaschii*, Figure S1F) is not involved in H bonding. The distances between K265-N $\zeta$  and E238-O $\epsilon_2$ , and between K265-N $\zeta$  and E416-O $\epsilon_2$  are 5.1 Å and 10.7 Å, respectively. The distance between Q235- (E227 in *M. jannaschii*) and E416-O $\epsilon_1$  is 7.9 Å.

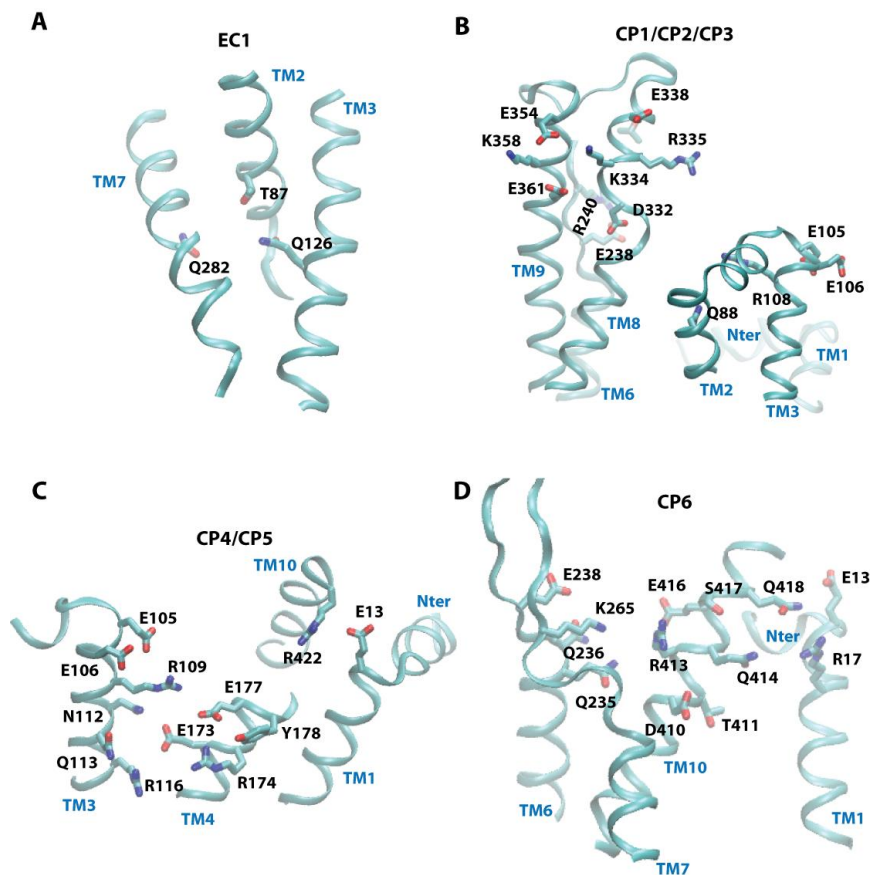

**Figure S5.** Alignment of Sec61p/SecY sequences from *T. thermophilus*, *M. jannaschii*, *E. coli*, *T. maritima*, and *S. cerevisiae* (referred to in Figure 3). We aligned the SecY sequences whose X-ray crystal structures have been solved (*M. jannaschii*, van den Berg 2003; *T. thermophilus*, Tsukazaki 2008; *T. maritima*, Zimmer 2008), and the sequences of SecY/Sec61 from *E. coli/S. cerevisiae*.

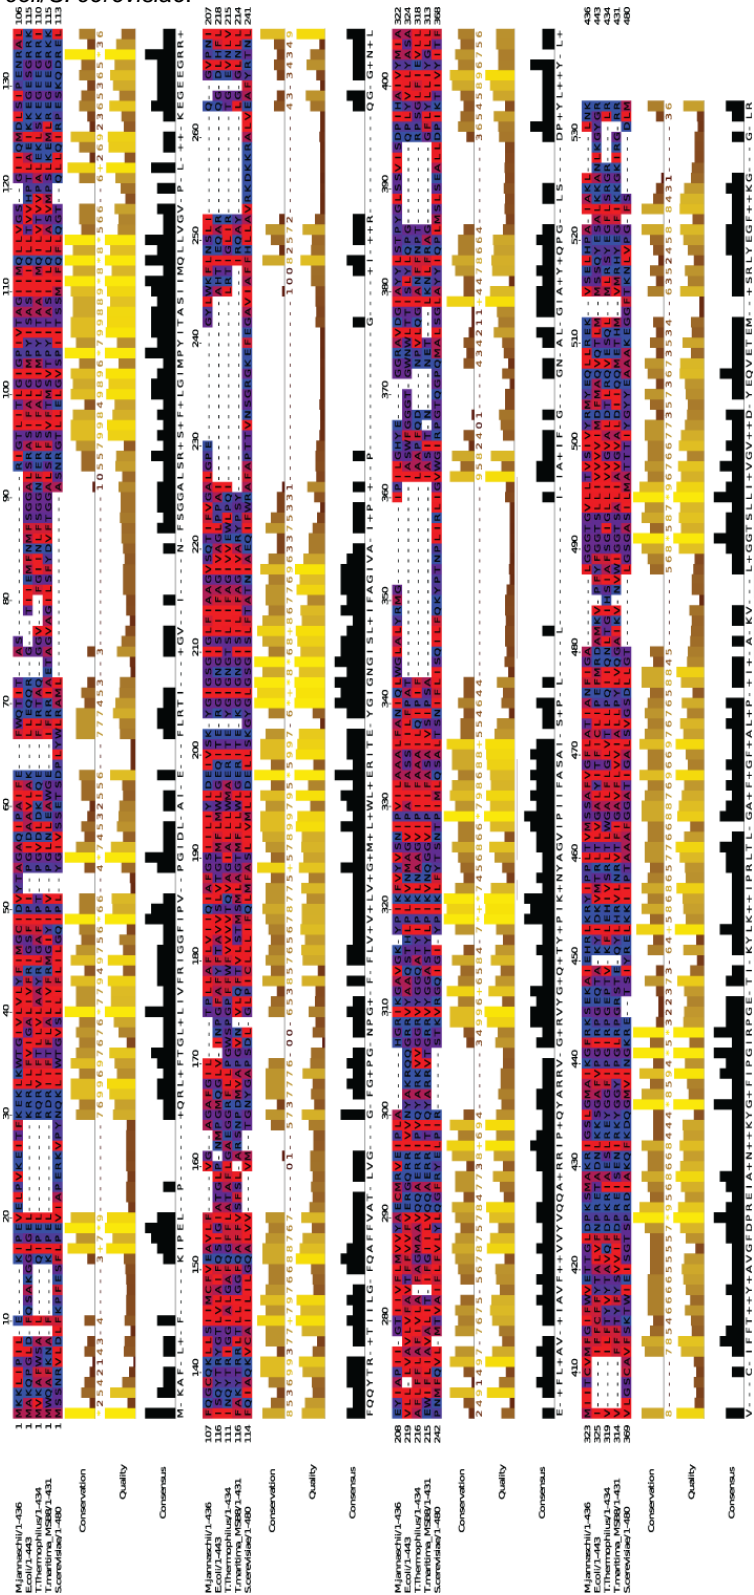



**Figure S6.** Frequency of analysis for selected H-bonding amino acids in SecY from archaea referred to in Figure 3. The frequency of SecY H-bonding amino-acids from Tables S1-S2 was analyzed as described in 'Protocol for sequence analysis', below. See Figure S2 for the location of H-bonding amino acids, and Tables S1-S2 for the H-bonding dynamics.

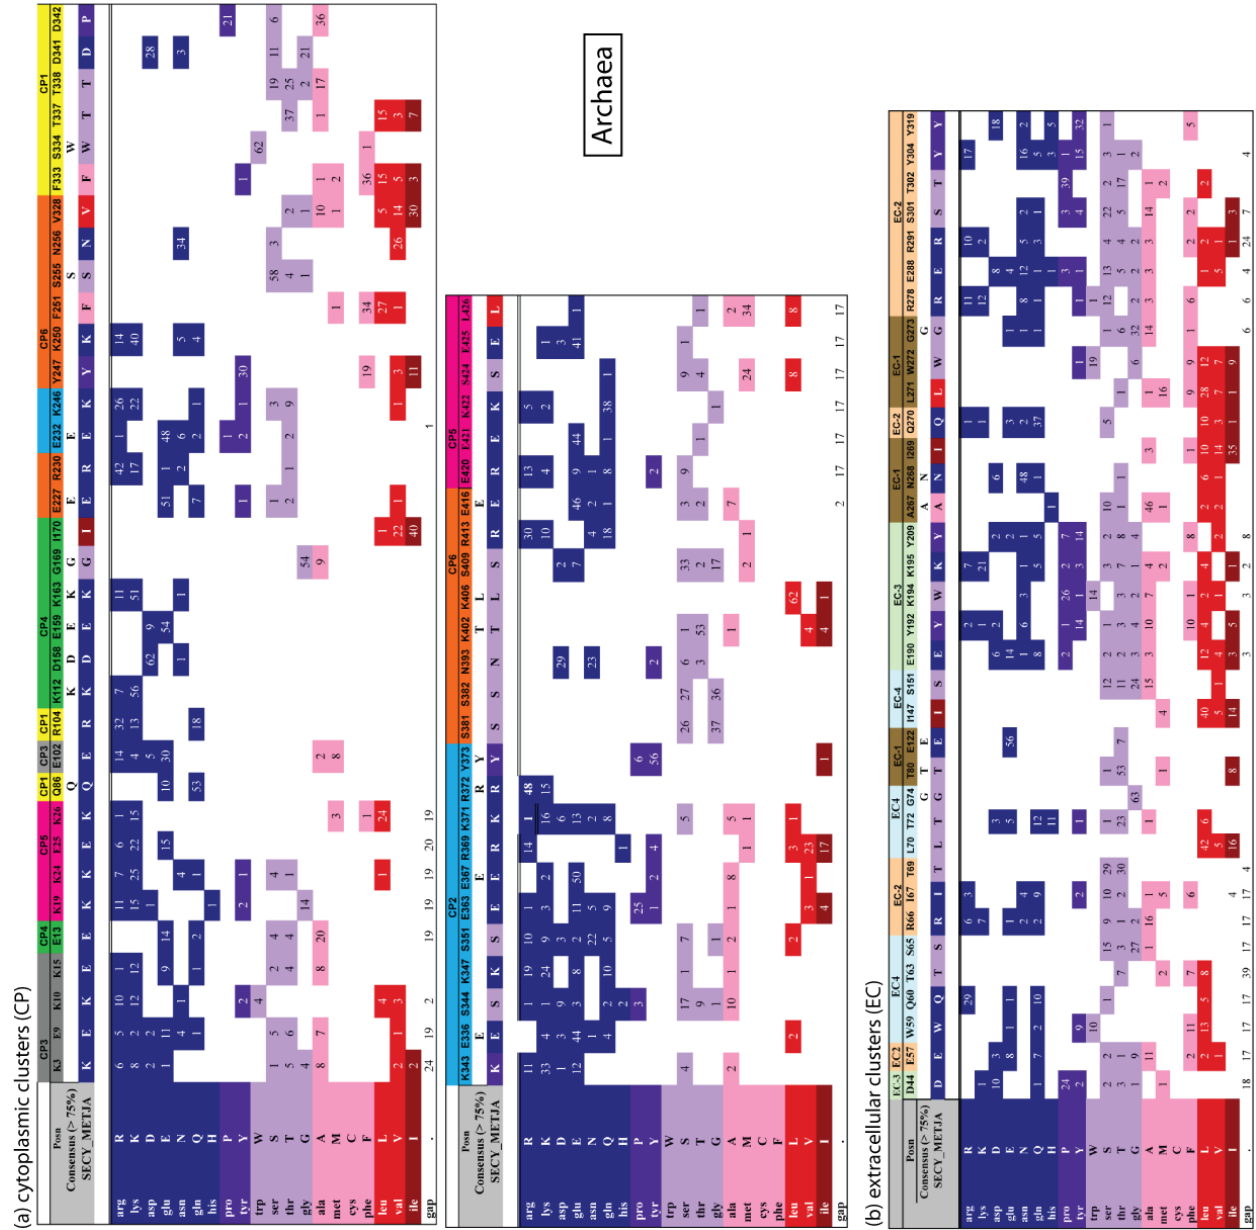

**Figure S7.** Frequency of analysis for selected H-bonding amino acids in SecY from bacteria referred to in Figure 3. The frequency of SecY H-bonding amino-acids from Tables S1-S2 was analyzed as described in 'Protocol for sequence analysis', below. See Figure S2 for the location of H-bonding amino acids, and Tables S1-S2 for the H-bonding dynamics.

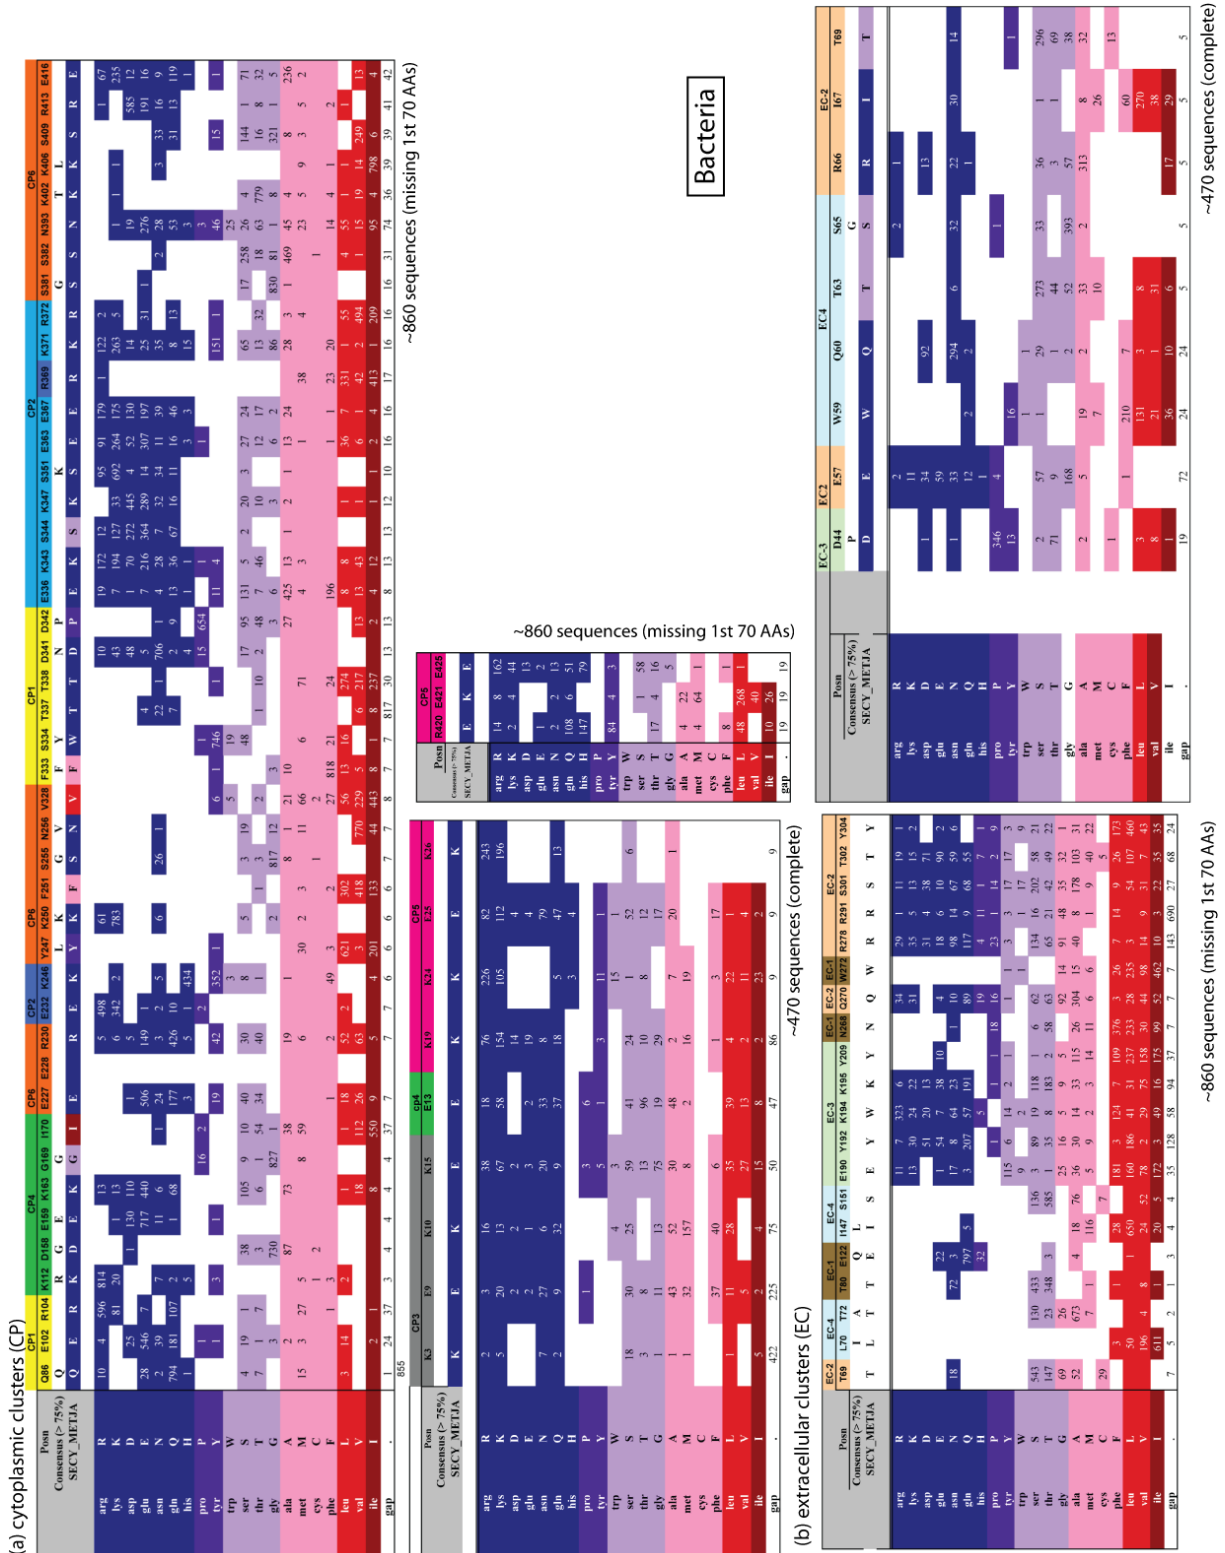



**Figure S9.** Frequency analysis for selected H-bonding amino acids in SecE from archaea referred to in Figure 3. The frequency of SecE H-bonding amino-acids from Tables S1-S2 was analyzed as described in 'Protocol for sequence analysis', below.

| Amino Acid | Major                              | Posn      |   | Positions |    |    |    |    |    |    |    |    |    |    |    |    |    |    |    |    |    |    |  |
|------------|------------------------------------|-----------|---|-----------|----|----|----|----|----|----|----|----|----|----|----|----|----|----|----|----|----|----|--|
|            |                                    | Major     |   | Positions |    |    |    |    |    |    |    |    |    |    |    |    |    |    |    |    |    |    |  |
|            |                                    | 1RHZ/1-65 |   | 7         | 16 | 17 | 19 | 20 | 21 | 26 | 27 | 28 | 32 | 60 | 63 | 21 | 38 | 43 | 48 | 51 |    |    |  |
|            |                                    |           |   |           |    |    |    | R  | V  |    |    | K  | P  | E  |    |    |    | V  | K  | G  | G  | G  |  |
|            | Methanocaldococcus jannaschii/1-74 | K         | E | E         | R  | R  | V  | K  | K  | P  | E  | Y  | K  | V  | K  | G  | G  | G  |    |    |    |    |  |
| arg        | R                                  |           |   |           | 7  | 23 |    | 11 | 1  |    |    |    |    |    |    |    |    |    |    |    |    |    |  |
| lys        | K                                  | 4         | 6 |           | 10 |    |    | 11 | 22 |    |    |    | 9  |    |    |    |    |    |    |    |    | 23 |  |
| asp        | D                                  |           |   | 2         |    |    |    |    |    |    |    |    |    |    |    |    |    |    |    |    |    |    |  |
| glu        | E                                  |           | 4 | 8         | 1  |    |    |    |    |    | 23 | 1  | 1  |    |    |    |    |    |    |    |    |    |  |
| asn        | N                                  | 1         | 2 |           |    |    |    |    |    |    |    |    |    |    |    |    |    |    |    |    |    |    |  |
| gln        | Q                                  |           | 2 | 8         | 1  |    |    |    |    |    |    |    |    |    |    |    |    |    |    |    |    |    |  |
| his        | H                                  |           | 2 |           |    |    |    |    |    |    |    |    |    |    |    |    |    |    |    |    |    |    |  |
| pro        | P                                  |           |   |           |    |    |    |    |    |    | 23 |    |    |    |    |    |    |    |    |    |    | 4  |  |
| tyr        | Y                                  | 1         |   |           |    |    |    |    |    |    |    |    | 9  |    |    |    |    |    |    |    |    |    |  |
| trp        | W                                  |           |   |           |    |    |    |    |    |    |    |    |    |    |    |    |    |    |    |    |    |    |  |
| ser        | S                                  |           | 1 | 1         |    |    |    |    |    |    |    |    |    |    |    |    |    |    |    |    |    | 1  |  |
| thr        | T                                  | 6         |   |           |    |    |    |    | 1  |    |    |    |    |    |    |    |    |    |    |    |    |    |  |
| gly        | G                                  |           |   |           |    |    |    |    |    |    |    |    |    |    |    |    |    |    |    |    | 23 | 23 |  |
| ala        | A                                  |           |   | 2         | 4  |    |    |    |    |    |    |    |    |    |    |    |    |    |    |    |    |    |  |
| met        | M                                  | 2         |   |           |    |    |    |    |    |    |    |    |    |    |    |    |    |    |    |    |    |    |  |
| cys        | C                                  |           |   |           |    |    |    |    |    |    |    |    |    |    |    |    |    |    |    |    |    |    |  |
| phe        | F                                  | 2         |   |           |    |    |    |    |    |    |    |    |    |    |    |    |    |    |    |    |    |    |  |
| leu        | L                                  | 1         |   |           | 4  |    |    |    |    |    |    |    |    |    |    |    |    |    |    |    |    |    |  |
| val        | V                                  |           |   |           |    |    |    | 22 |    |    |    |    |    | 8  | 1  |    |    |    |    |    |    |    |  |
| ile        | I                                  | 2         |   |           |    |    |    |    | 1  |    |    |    |    |    |    |    |    |    |    |    |    |    |  |
| gap        | .                                  | 4         |   |           |    |    |    |    |    |    |    |    |    |    |    |    |    |    |    |    |    | 7  |  |

**Figure S10.** Frequency analysis for selected H-bonding amino acids in SecE from bacteria referred to in Figure 3. The frequency of SecE H-bonding amino-acids from Tables S1-S2 was analyzed as described in 'Protocol for sequence analysis', below.

| Amino Acid | Major          | Posn  |     | Positions |     |     |    |    |     |     |     |     |    |     |     |     |     |     |     |     |     |  |  |
|------------|----------------|-------|-----|-----------|-----|-----|----|----|-----|-----|-----|-----|----|-----|-----|-----|-----|-----|-----|-----|-----|--|--|
|            |                | Major |     | Positions |     |     |    |    |     |     |     |     |    |     |     |     |     |     |     |     |     |  |  |
|            |                | 1RHZ  |     | 7         | 16  | 17  | 19 | 20 | 21  | 22  | 26  | 27  | 28 | 32  | 38  | 43  | 48  | 51  | 55  | 60  | 62  |  |  |
|            |                |       |     |           |     |     |    | K  | K   | V   |     | W   | P  | E   | L   |     |     |     |     | D   |     |  |  |
|            | IF4_ECOKI/1-57 | K     | E   | E         | R   | R   | V  | W  | K   | K   | P   | E   | K  | G   | G   | G   | H   | Y   | K   |     |     |  |  |
| arg        | R              | 238   | 45  | 301       | 55  | 55  |    |    | 1   | 1   |     | 3   |    |     |     |     |     |     | 98  |     |     |  |  |
| lys        | K              | 130   | 31  | 152       | 551 | 551 |    |    | 7   | 1   |     | 2   | 7  |     |     |     |     |     | 63  | 17  |     |  |  |
| asp        | D              | 33    | 6   | 1         | 1   | 1   |    |    | 1   |     |     | 22  |    |     |     |     |     |     | 633 |     | 3   |  |  |
| glu        | E              | 2     | 31  | 28        | 1   | 1   |    |    | 4   |     |     | 514 | 4  |     |     |     |     |     | 4   | 12  | 5   |  |  |
| asn        | N              | 6     | 20  | 5         | 15  | 15  |    |    | 5   |     |     | 1   | 2  |     |     |     |     |     | 3   | 46  | 1   |  |  |
| gln        | Q              | 1     | 17  | 49        | 4   | 11  | 11 |    | 5   |     |     | 118 | 6  |     |     |     |     |     |     | 29  |     |  |  |
| his        | H              |       | 7   | 8         | 19  | 9   | 9  |    | 11  |     |     |     |    |     |     |     |     |     | 1   | 14  |     |  |  |
| pro        | P              |       |     |           |     |     |    |    |     |     |     | 641 | 1  |     |     |     |     |     |     |     |     |  |  |
| tyr        | Y              | 64    | 2   | 21        |     |     |    |    |     |     | 4   |     |    |     |     | 2   |     |     |     | 24  | 2   |  |  |
| trp        | W              | 20    |     |           |     |     |    |    |     |     | 632 |     |    |     |     |     |     |     |     |     |     |  |  |
| ser        | S              | 16    | 89  | 44        |     |     |    |    | 76  |     |     |     |    | 24  | 14  | 203 |     |     | 21  | 40  | 21  |  |  |
| thr        | T              | 1     | 93  | 2         |     |     |    |    | 27  | 144 | 7   | 11  | 6  | 24  | 70  | 26  | 15  | 2   | 29  | 31  |     |  |  |
| gly        | G              | 19    | 15  | 15        | 1   | 1   |    |    |     |     |     |     |    | 54  | 1   | 48  | 1   | 6   | 18  |     |     |  |  |
| ala        | A              | 13    | 134 | 50        | 1   | 1   | 1  | 1  | 7   | 2   | 11  | 3   | 42 | 67  | 298 | 1   |     |     | 34  | 28  |     |  |  |
| met        | M              | 2     | 17  | 4         |     |     |    |    |     |     |     |     |    | 1   | 6   | 124 | 22  | 5   |     | 1   | 52  |  |  |
| cys        | C              | 1     |     | 2         |     |     |    |    | 1   |     |     | 2   |    |     |     | 1   | 6   | 19  |     |     |     |  |  |
| phe        | F              | 15    | 16  | 4         |     |     |    |    |     |     | 4   | 24  |    | 1   | 35  | 167 |     | 172 |     | 45  | 36  |  |  |
| leu        | L              | 10    | 23  | 12        | 26  | 26  |    |    |     |     | 2   | 5   | 2  | 209 | 24  | 20  | 296 |     |     | 24  | 87  |  |  |
| val        | V              | 69    | 30  | 1         |     |     |    |    | 590 | 305 | 1   | 3   |    | 133 | 172 | 30  | 71  | 1   | 9   | 220 |     |  |  |
| ile        | I              | 39    | 35  | 2         | 1   | 1   | 1  | 55 | 104 |     |     | 1   |    | 107 | 32  | 21  | 93  |     |     | 7   | 161 |  |  |
| gap        | .              | 673   | 5   | 3         | 2   | 2   | 2  |    | 673 |     |     |     |    |     |     |     |     | 1   | 3   | 10  | 9   |  |  |

**Figure S11.** Frequency analysis for selected H-bonding amino acids in SecE from eukarya referred to in Figure 3. The frequency of SecE H-bonding amino-acids from Tables S1-S2 was analyzed as described in 'Protocol for sequence analysis', below.

| Amino Acid | Major           | Posn  |    | Positions |    |    |    |    |    |    |    |    |    |    |    |    |    |    |   |  |    |   |  |
|------------|-----------------|-------|----|-----------|----|----|----|----|----|----|----|----|----|----|----|----|----|----|---|--|----|---|--|
|            |                 | Major |    | Positions |    |    |    |    |    |    |    |    |    |    |    |    |    |    |   |  |    |   |  |
|            |                 | 1RHZ  |    | 7         | 16 | 17 | 19 | 20 | 21 | 26 | 27 | 28 | 32 | 43 | 48 | 51 | 60 | 62 |   |  |    |   |  |
|            |                 |       |    |           |    |    |    | R  | R  | V  | K  | K  | P  | E  | G  | G  | G  | P  | N |  |    |   |  |
|            | SC61G_YEAST/157 | K     | E  | E         | R  | R  | V  | K  | K  | P  | E  | G  | G  | G  | Y  | K  |    |    |   |  |    |   |  |
| arg        | R               |       | 13 |           | 8  | 56 |    |    |    |    |    |    |    |    |    |    |    |    |   |  | 8  |   |  |
| lys        | K               | 1     | 62 |           | 1  | 1  |    |    |    | 6  | 90 |    |    |    |    |    |    |    |   |  | 1  |   |  |
| asp        | D               |       |    | 62        |    |    |    |    |    |    |    |    |    |    |    |    |    |    |   |  |    |   |  |
| glu        | E               |       | 2  | 16        |    |    |    |    | 1  | 1  |    |    |    |    | 92 |    |    |    |   |  |    |   |  |
| asn        | N               |       | 6  | 10        |    | 1  |    |    | 1  | 1  |    |    |    |    |    |    |    |    |   |  | 81 |   |  |
| gln        | Q               |       | 5  |           |    |    | 19 |    | 15 | 1  |    |    |    | 2  |    |    |    |    |   |  |    |   |  |
| his        | H               |       | 2  |           |    |    |    |    | 10 |    |    |    |    |    |    |    |    |    |   |  |    |   |  |
| pro        | P               |       |    |           |    |    |    |    |    |    |    |    |    |    |    |    |    |    |   |  |    |   |  |
| tyr        | Y               |       |    |           | 8  |    |    |    |    |    |    |    | 94 |    |    |    |    |    |   |  | 91 |   |  |
| trp        | W               |       |    |           |    |    |    |    |    |    |    |    |    |    |    |    |    |    |   |  |    |   |  |
| ser        | S               |       |    |           | 3  | 3  |    |    |    |    |    |    |    |    |    |    |    |    |   |  |    |   |  |
| thr        | T               |       |    |           |    | 13 |    |    |    |    | 57 |    |    |    |    |    |    |    |   |  | 1  |   |  |
| gly        | G               |       |    |           | 2  |    |    |    |    |    |    |    |    |    | 94 | 92 | 94 |    |   |  |    |   |  |
| ala        | A               |       |    |           |    | 2  | 2  |    |    |    | 1  |    |    |    |    |    |    |    |   |  |    |   |  |
| met        | M               |       |    |           |    | 8  | 5  |    |    |    |    |    |    |    |    |    |    |    |   |  |    |   |  |
| cys        | C               |       |    |           |    |    |    |    |    |    |    |    |    |    |    |    |    |    |   |  |    |   |  |
| phe        | F               |       | 1  |           |    |    |    |    |    |    | 38 |    |    |    |    |    |    |    |   |  |    |   |  |
| leu        | L               |       | 1  |           |    | 2  | 9  | 55 |    |    |    |    |    |    |    |    |    |    |   |  | 1  |   |  |
| val        | V               |       |    |           |    | 20 |    | 1  | 2  |    |    |    |    |    |    |    |    |    |   |  | 2  |   |  |
| ile        | I               |       |    |           |    | 28 |    |    |    |    |    |    |    |    |    |    |    |    |   |  |    |   |  |
| gap        | .               | 93    | 1  | 1         |    |    |    |    |    |    |    |    |    |    |    |    |    |    |   |  | 1  | 2 |  |

**Figure S12.** SecY sequence alignment for archaea referred to in Figure 3. The 63 sequences of SecY from archaea were aligned as described in 'Protocol for sequence analysis', below. The organism names and Pfam access codes for all SecY archaeal sequences are given in Table 4.

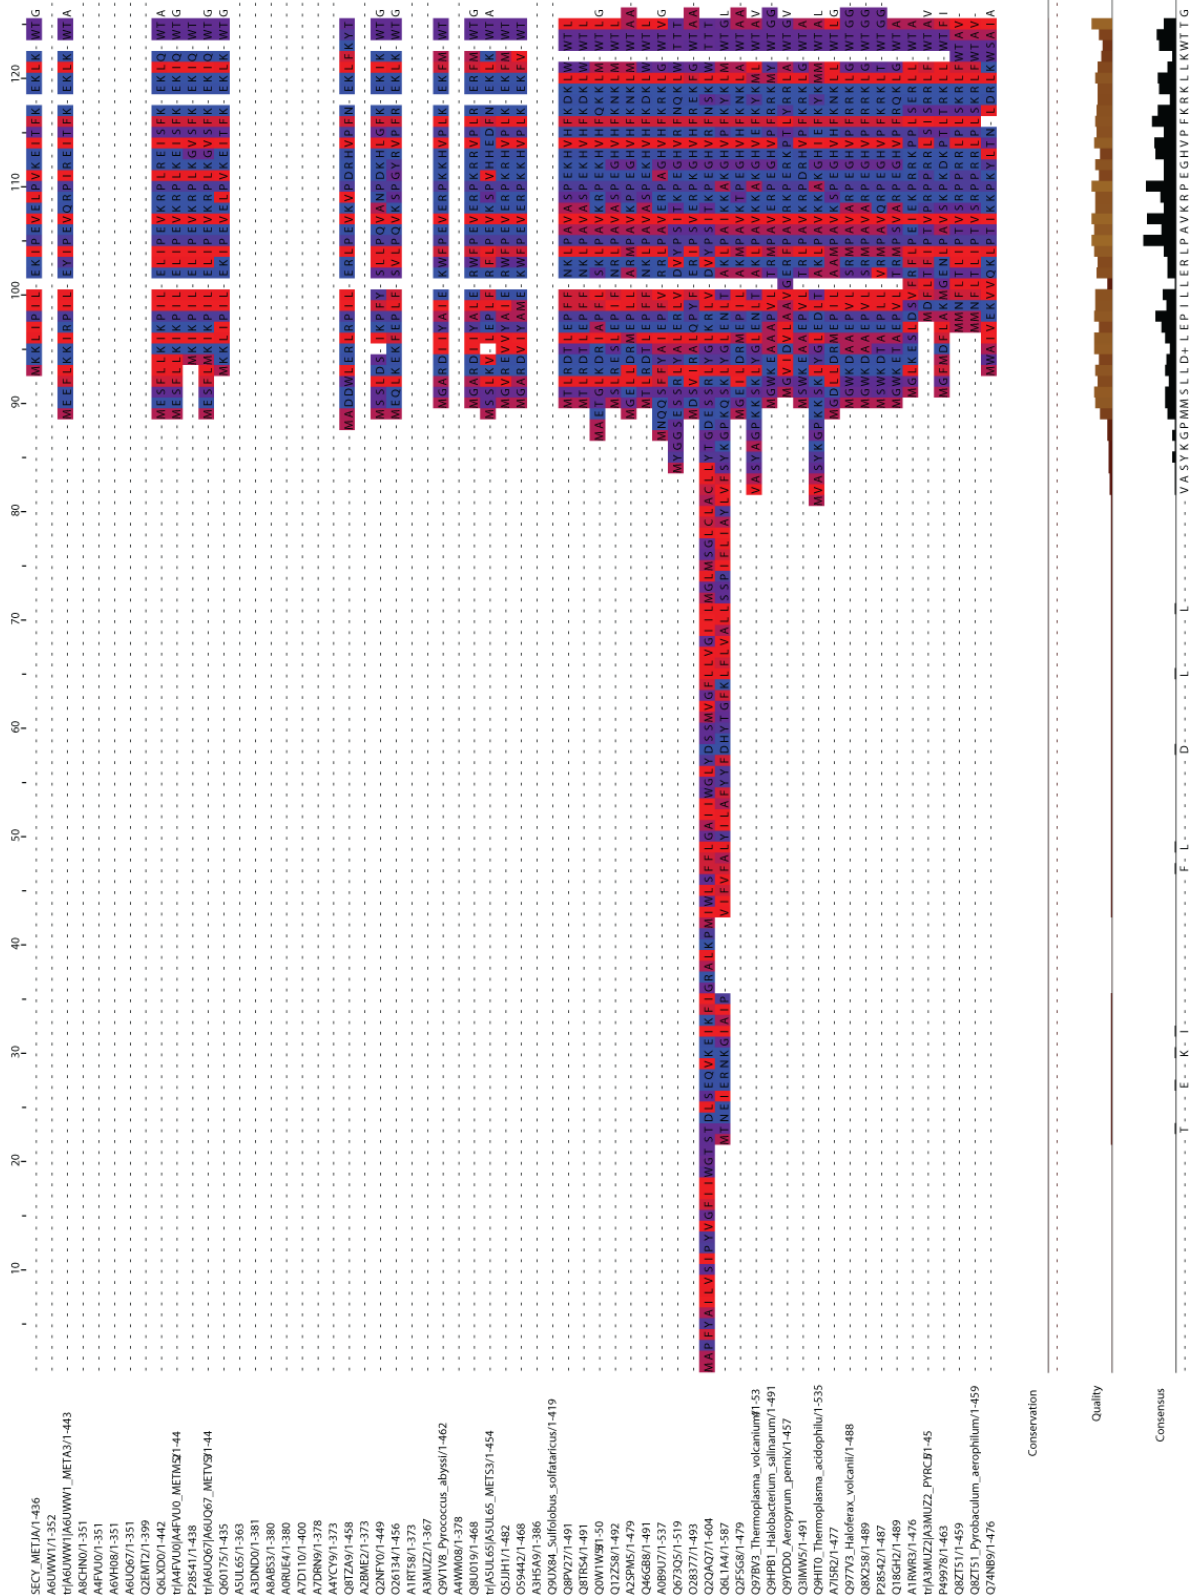

SECY\_METAI/1-436  
 A6UWV1-352  
 TFA6UWV1A6UWV1\_METAS71-443  
 A8CHN001-351  
 A4FVU001-351  
 A6VH081-351  
 A6L00671-351  
 O2M271-399  
 O8X0D01-442  
 TFA6UWV1A6UWV1\_METM51-442  
 TFA6UWV1A6UWV1\_METM51-442  
 TFA6UWV1A6UWV1\_METM51-442  
 O8M1731-435  
 A5L061-385  
 A3D0R001-381  
 A8M0531-380  
 A8M0641-380  
 A7D1101-400  
 A7D0R01-378  
 A4TCH91-378  
 A2M2Z1-373  
 A2M2N1-449  
 O2G3441-456  
 A1M1581-373  
 A3M0Z21-367  
 O9VYV6\_Pyrocooccus\_abyssi/1-462  
 A4W0M081-378  
 T8U0191-468  
 TFA5U65ASU65\_METS31-454  
 O5JH171-468  
 O594421-462  
 A3H5A91-386  
 O9UX84\_Sulfolobus\_solfataricus/1-419  
 O8M271-491  
 O8TR541-491  
 O0W1M51-508  
 Q1Z3581-492  
 A25PM51-479  
 O4G6B81-491  
 A0B9U71-537  
 O283771-493  
 Q20A071-604  
 O6L1A41-587  
 Q2F5G81-479  
 O97BV3\_Thermoplasma\_volcanium/1-534  
 O9HPB1\_Halobacterium\_salinarum/1-491  
 Q9YDD0\_Aeropyrum\_pernix/1-457  
 Q3M0M51-491  
 O9HHT0\_Thermoplasma\_acidophilum/1-535  
 A75R21-477  
 O97V73\_Halobacterium\_volcanium/1-488  
 O8X2581-489  
 P285421-487  
 Q18GH21-489  
 A1RWR31-476  
 TFA3MU2IA3MU2\_PYRCJ1-455  
 P499781-463  
 O8Z511-459  
 O8Z511-459  
 O8Z511-459  
 O7N891-476

120 130 140 150 160 170 180 190 200 210 220 230 240

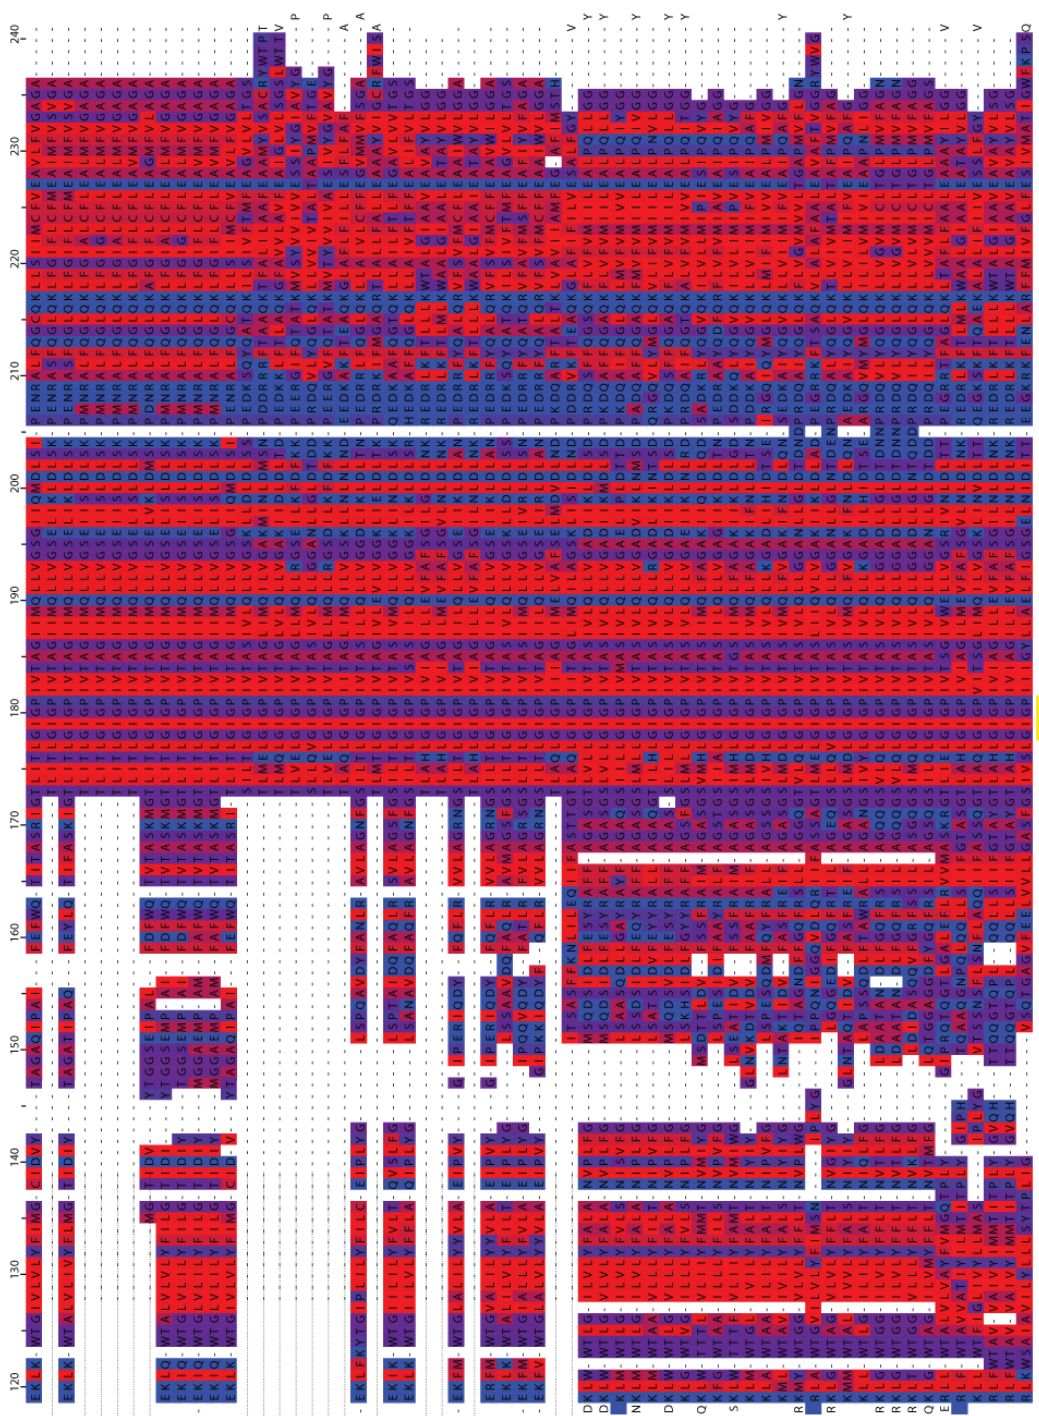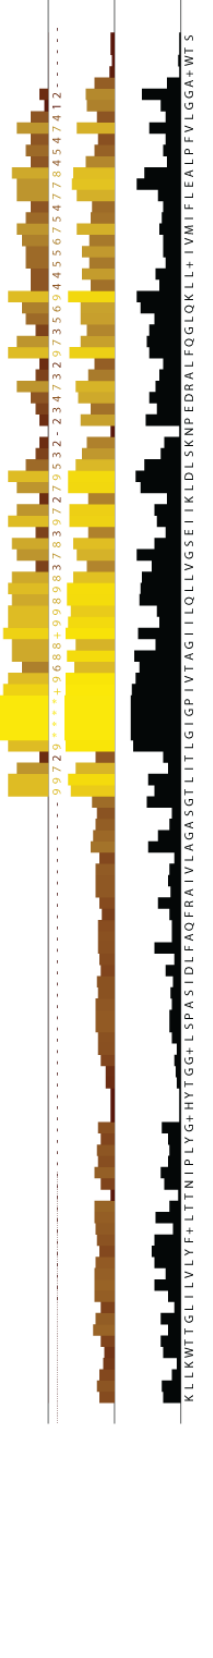



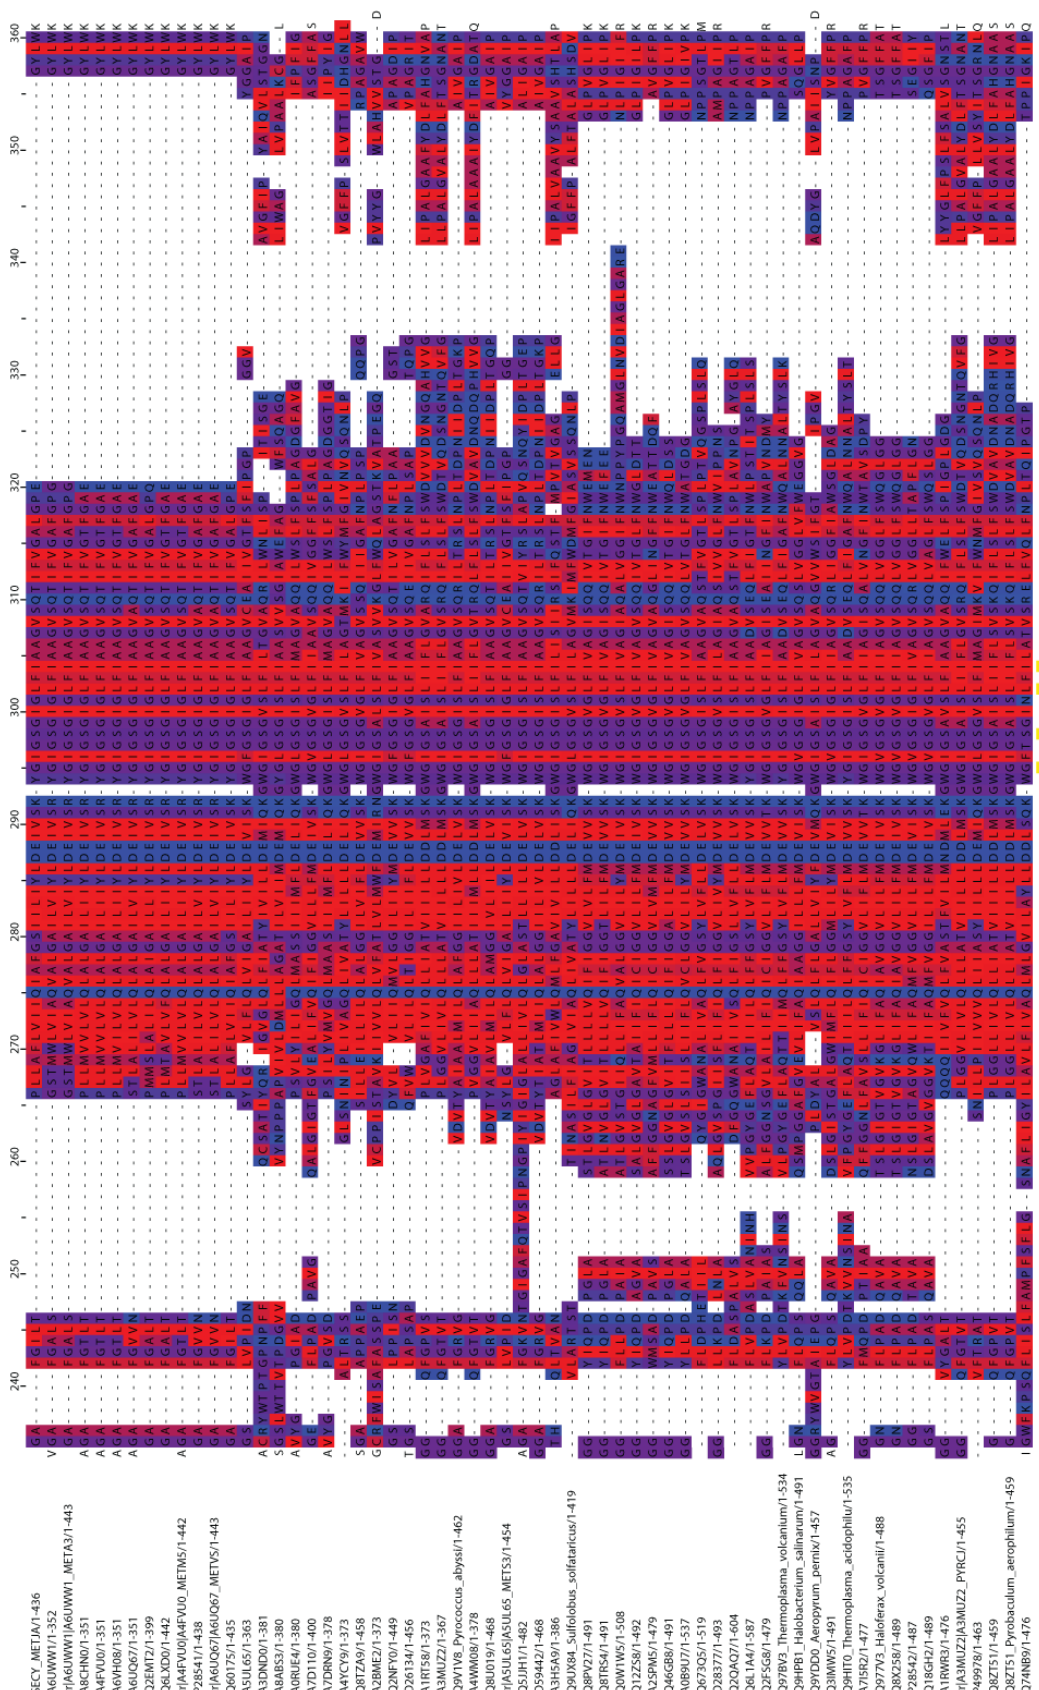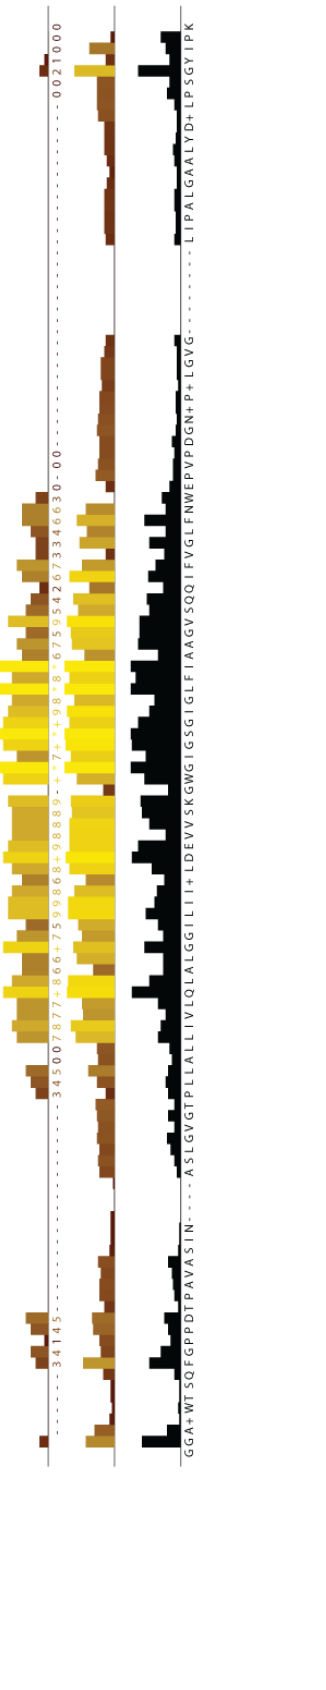



SECY\_MET1A/1-436  
 A6UW01/1-352  
 A6UW01/1A6UW01\_MET1A3/1-443  
 ABCN001/1-351  
 A4VU001/1-351  
 A6VH081/1-351  
 A6VJ061/1-351  
 O2BMT2/1-399  
 O8YX001/1-442  
 H1A4VU01/MEVUO\_MET1M5/1-442  
 P3E54/1-438  
 H1A6U01/MEU067\_MET1M5/1-443  
 G80173/1-455  
 A3D000/1-581  
 A8K031/1-380  
 A8K0E4/1-380  
 A7D101/1-400  
 A7D0R0/1-378  
 A4T1C9/1-373  
 O2BZ01/1-458  
 O2BNF0/1-449  
 O2B341/1-456  
 A1M501/1-373  
 A3M0U2/1-367  
 O9V1V6\_Pyrocooccus\_abyssi/1-462  
 A4W0M0/1-378  
 G8U019/1-468  
 H1A5U01/ASUL65\_MET1S3/1-454  
 O5JH1/1-482  
 O5944/1-468  
 A3H5A9/1-386  
 O9U0X84\_Sulfolobus\_solfataricus/1-471  
 O8R27/1-491  
 O8R15A/1-491  
 O0W1M5/1-508  
 Q12528/1-492  
 A2SPM5/1-479  
 O46G80/1-491  
 A089U7/1-537  
 O67305/1-519  
 O2837/1-493  
 O20A02/1-604  
 O6L1A4/1-587  
 Q2F568/1-479  
 O97B93\_Thermoplasma\_volcanium/1-  
 O9HP01\_Halobacterium\_salinarum/1-  
 O9YDD0\_Aeropyrum\_pernix/1-457  
 O3M0W5/1-491  
 O9H1T0\_Thermoplasma\_acidophilum/1-  
 A71502/1-477  
 O977V3\_Haloferax\_volcanii/1-488  
 O8X258/1-489  
 P2854/1-487  
 O18G42/1-489  
 A1RWR3/1-476  
 H1A3M0U2/A3M0U22\_PPRC/1-455  
 P49978/1-463  
 O8Z15/1-459  
 O8Z151\_Pyrobaculum\_aerophilum/1-  
 O7AN09/1-476

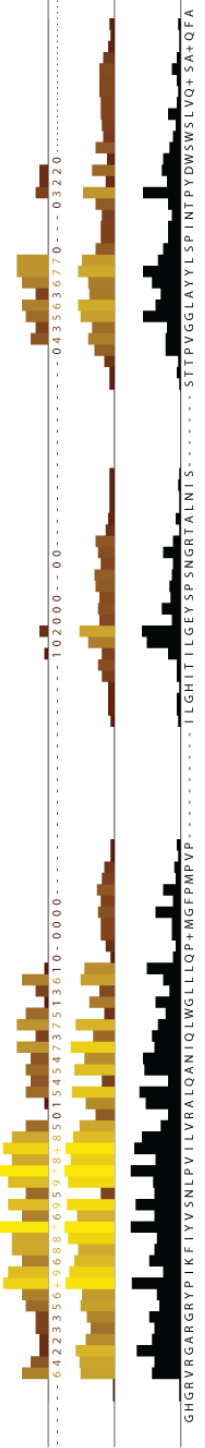

450  
 460  
 470  
 480  
 490  
 500  
 510  
 520  
 530  
 540  
 550  
 560  
 570



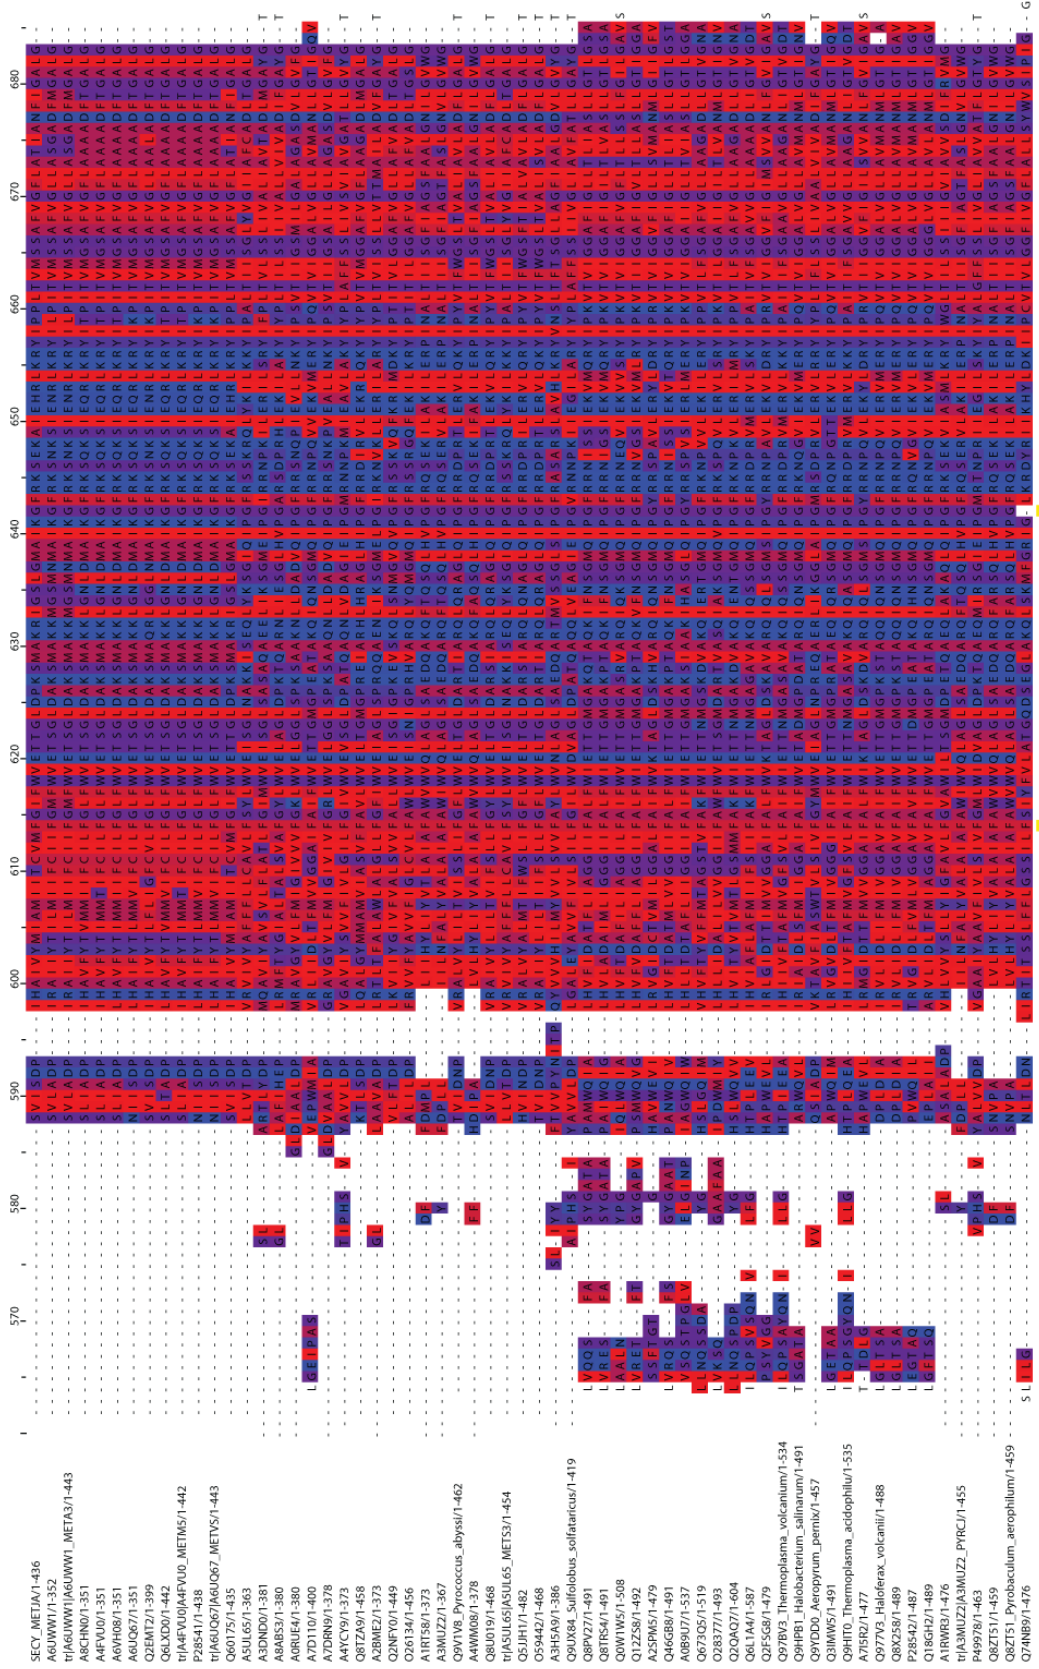

SECY\_MET1A/1-436  
 A6UW1/1-352  
 trAGUW1/AGUW1\_MET1A/1-443  
 ARCHN01/351  
 A4YU01/351  
 A6V9R/1-351  
 A6U0G/1-351  
 Q6EM2/1-399  
 Q6LQD/1-442  
 trIA6VU10/IA6VU10\_MET1M5/1-442  
 P9841/1-438  
 trIA6U067/IA6U067\_MET1M5/1-443  
 Q60175/1-435  
 A3U6B/1-365  
 A3DN001/381  
 A6B53/1-380  
 AR0E4/1-380  
 A7D10/1-400  
 A7DRN9/1-378  
 A4Y19/1-373  
 Q8Z29/1-458  
 A2BMEZ/1-373  
 Q2NFY0/1-449  
 Q26134/1-456  
 A1R15B/1-373  
 A3MUZ2/1-367  
 Q9V1B\_Pyrococcus\_abyssi/1-462  
 A4WM08/1-378  
 Q8U019/1-468  
 trIASUL65/IASUL65\_MET1S/1-454  
 Q5JH1/1-482  
 O59442/1-468  
 A3H5A/1-386  
 Q9UX84\_Sulfolobus\_solfataricus/1-419  
 Q8R27/1-491  
 Q8R54/1-491  
 Q0M1W5/1-508  
 Q12Z58/1-492  
 A25PM5/1-479  
 Q46GB8/1-491  
 A08A7/1-537  
 Q28377/1-493  
 Q673Q5/1-519  
 Q20A07/1-604  
 Q6L1A4/1-587  
 Q2F5G8/1-479  
 Q97R/3\_Thermoplasma\_volcanium/1-534  
 Q9HPB1\_Halobacterium\_salinarum/1-491  
 Q9YD00\_Aeropyrum\_pernix/1-457  
 Q3MWS/1-491  
 Q9HT0\_Thermoplasma\_acidophilum/1-535  
 A75R2/1-477  
 Q97Y/3\_Haloferax\_volcanii/1-488  
 P28542/1-487  
 Q18GH2/1-489  
 A1RWS/1-476  
 trIA3MUZ2/IA3MUZ2\_PYRC/1-455  
 P49978/1-463  
 Q8ZT5/1-459  
 Q8ZT51\_Pyrobaculum\_aerophilum/1-459  
 I N K T I I S G F I A G S F A A L G N L L G V W G - - - - -  
 P E T V L G G E I V S G E L L S Y A W S I P I G - - - - -  
 2 2 9 7 7 8 6 5 7 - 4 8 6 4 7 8 7 7 5 - 6 1 1 - 7 1 6 - 9 3 - 5 6 4 - 5 4 6 0 3 0 0 - - - - -

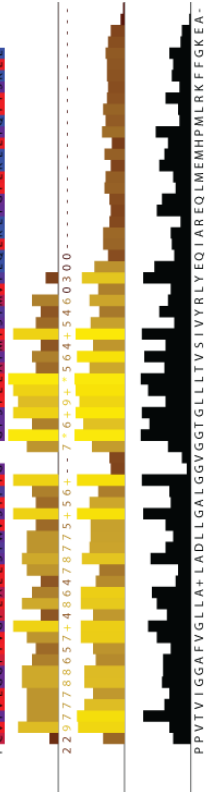

**Table S1.** Summary of H-bonding analysis for the cytoplasmic half of wild-type SecY (Sim 1). Extent of hydrogen-bonding interactions observed in simulations of the SecYEG translocon. The extent is represented as percent of time hydrogen bonds were made. We analyzed the dynamics of distances for selected H-bonding amino acids in the wild-type translocon for the last 10 ns and 20 ns segments of Sim1 (Figure 1G). As the H-bonding criterion, we used a distance of less than 3.5 Å between the heavy atoms. See Figure S1 for the H-bonding clusters. Indicated in *italics* are amino acids whose mutation is known to cause translocation defects (see Table S3 for details).

| Cluster                           | Hydrogen bond                     |                                     | Last 10 ns | Last 20 ns |
|-----------------------------------|-----------------------------------|-------------------------------------|------------|------------|
| CP1                               | S344-O $\gamma$                   | D341-O $\delta$ 1                   | 89.2       | 69.0       |
|                                   | S344-O $\gamma$                   | D341-O $\delta$ 2                   | 84.9       | 67.0       |
|                                   | S344-O $\gamma$                   | R104-NH1                            | 0          | 3.0        |
|                                   | R104-NH1                          | D341-O $\delta$ 1                   | 0          | 9.2        |
|                                   | R104-NH1                          | D341-O $\delta$ 2                   | 0          | 4.2        |
|                                   | R104-NH1                          | <i>E336-O</i>                       | 22.3       | 13.8       |
|                                   | R104-NH2                          | <i>E336-OE1</i>                     | 48.7       | 24.4       |
|                                   | T337-O $\gamma$ 1                 | Q86-N $\epsilon$ 2                  | 0.1        | 6.2        |
| T338-O $\gamma$ 1                 | <i>F333-O</i>                     | 25.4                                | 36.9       |            |
| CP2                               | K343-NZ                           | E367-O $\epsilon$ 1                 | 44.9       | 73.9       |
|                                   | K343-NZ                           | E367-O $\epsilon$ 2                 | 85.8       | 73.2       |
|                                   | K347-NZ                           | E363-O $\epsilon$ 1                 | 27.5       | 15.7       |
|                                   | K347-NZ                           | E363-O $\epsilon$ 2                 | 32.4       | 18.0       |
|                                   | K371-NZ                           | E367-O $\epsilon$ 1                 | 7.6        | 12.0       |
|                                   | R369-NH1                          | L234-O                              | 44.1       | 26.1       |
|                                   | R372-NH2                          | SecE_E17-O $\epsilon$ 1             | 75.1       | 79.7       |
|                                   | R230-NH1                          | SecE_E32-O $\epsilon$ 1             | 54.6       | 56.9       |
|                                   | E232-O $\epsilon$ 1               | SecE_K26-NZ                         | 21.9       | 13.2       |
|                                   | E232-O $\epsilon$ 1               | K246-NZ                             | 51.7       | 62.3       |
| E232-O $\epsilon$ 2               | K246-NZ                           | 81.1                                | 66.4       |            |
| CP3                               | E102-O $\epsilon$ 1               | K3-NZ                               | 12.4       | 40.3       |
|                                   | E102-O $\epsilon$ 2               | K3-NZ                               | 12.0       | 45.5       |
|                                   | E9-O $\epsilon$ 1                 | K10-NZ                              | 65.0       | 46.8       |
|                                   | E9-O $\epsilon$ 2                 | K10-NZ                              | 4.3        | 22.0       |
|                                   | E13-N                             | Sec $\beta$ _S25-OG                 | 61.5       | 50.0       |
| CP4                               | <i>K112-NZ</i>                    | E13-O $\epsilon$ 2                  | 28.8       | 61.7       |
|                                   | <i>K112-NZ</i>                    | <i>E159-O<math>\epsilon</math>2</i> | 33.5       | 35.3       |
|                                   | K163-NZ                           | <i>E159-O<math>\epsilon</math>2</i> | 0.3        | 0.7        |
|                                   | <i>D158-O<math>\delta</math>1</i> | I170-N                              | 45.6       | 47.6       |
|                                   | <i>D158-O<math>\delta</math>2</i> | I170-N                              | 26.9       | 30.2       |
| <i>D158-O<math>\delta</math>1</i> | G169-N                            | 13.3                                | 11.4       |            |
| CP-5                              | E25-O $\epsilon$ 2                | K19-NZ                              | 87.1       | 87.8       |
|                                   | E421-O $\epsilon$ 2               | K26-NZ                              | 50.4       | 46.3       |
|                                   | E425-O $\epsilon$ 2               | K24-NZ                              | 36.1       | 18.0       |
|                                   | E425-O $\epsilon$ 1               | K24-NZ                              | 38.8       | 19.4       |
| CP-6                              | S409-O $\gamma$                   | <i>E227-O<math>\epsilon</math>2</i> | 99.9       | 96.6       |
|                                   | <i>K250-NZ</i>                    | <i>E416-O<math>\epsilon</math>2</i> | 38.2       | 49.3       |
|                                   | <i>K250-NZ</i>                    | <i>E227-O<math>\epsilon</math>1</i> | 5.9        | 3.9        |
|                                   | E416-O $\epsilon$ 2               | R413-NH1                            | 10.5       | 41.3       |
|                                   | E416-O $\epsilon$ 1               | R420-NH2                            | 2.4        | 10.1       |
|                                   | R419-NH1                          | L432-OT2                            | 54.3       | 27.1       |
|                                   | S382-O $\gamma$                   | S255-O $\gamma$                     | 10.5       | 9.6        |
|                                   | S381-O $\gamma$                   | S255-O $\gamma$                     | 98.5       | 98.6       |
|                                   | S381-O $\gamma$                   | F251-O                              | 100.0      | 99.9       |
|                                   | S409-O $\gamma$                   | <i>N256-Nd2</i>                     | 0.3        | 0.3        |
| N393-N $\delta$ 2                 | T402-O $\gamma$ 1                 | 97.3                                | 97.1       |            |



**Table S2.** Summary of H-bonding analysis for the periplasmic half of wild-type SecY (Sim 1). Extent of H-bonding interactions observed in simulations of the SecYEG translocon. The extent is represented as percent of time H bonds were made. We analyzed the dynamics of distances for selected H-bonding amino acids in the wild-type translocon for the last 10 ns and 20 ns segments of Sim1 (Figure 1G). As the H-bonding criterion, we used a distance of less than 3.5 Å between the heavy atoms. See Figure S1 for the H-bonding clusters. Indicated in *italics* are amino acids whose mutation is known to cause translocation defects (see Table S3 for details).

| Cluster | Hydrogen bond  |                 | Last 10ns | Last 20 ns |
|---------|----------------|-----------------|-----------|------------|
| EC-1    | E122-Oε2       | T80-Oγ1         | 23.1      | 35.6       |
|         | E122-Oε1       | <i>W272-Nε1</i> | 75.8      | 64.4       |
|         | E122-Oε1       | N268-Nδ2        | 85.8      | 80.3       |
|         | T80-Oγ1        | N268-Nδ2        | 95.0      | 94.9       |
| EC-2    | R278-NH2       | E288-O          | 78.0      | 83.4       |
|         | R291-NH1       | T302-O          | 100.0     | 100.0      |
|         | R291-NH1       | S301-Oγ         | 21.4      | 19.9       |
|         | T302-Oγ1       | Q270-Nε2        | 47.4      | 53.1       |
| EC-3    | E57-O          | Y304-OH         | 7.0       | 17.1       |
|         | E190-Oε2       | K195-NZ         | 37.1      | 44.0       |
|         | E190-Oε1       | K195-NZ         | 49.8      | 40.2       |
|         | Y192-OH        | E190-Oε1        | 0.4       | 1.0        |
|         | Y192-OH        | E190-Oε2        | 0.6       | 1.6        |
|         | Y209-OH        | K195-NZ         | 1.7       | 1.4        |
| EC-4    | E190-Oε1       | SecE_Y60-OH     | 22.4      | 18.5       |
|         | <i>W59-Nε1</i> | <i>T72/V-O</i>  | 99.8      | 99.9       |
|         | <i>T72-Oγ1</i> | <i>T69-N</i>    | 97.9      | 96.6       |
|         | <i>T72-Oγ1</i> | <i>T69-O</i>    | 99.5      | 99.7       |
|         | <i>S151-Oγ</i> | I147-O          | 91.6      | 95.6       |
|         | <i>S151-Oγ</i> | G74-N           | 23.9      | 51.3       |
|         | L70-O          | <i>T72-N</i>    | 77.4      | 81.1       |
|         | Q60-Oε1        | <i>R66-NH1</i>  | 6.9       | 9.4        |
|         | <i>T69-Oγ1</i> | <i>R66-O</i>    | 100.0     | 100.0      |
|         | Q60-Oε1        | I67-N           | 92.7      | 93.0       |
| S65-Oγ  | T63-Oγ1        | 96.8            | 96.6      |            |

**Table S3.** Known mutation effects of H-bonding amino acids relevant to Figures 4-9. See Figure S5 and S12 for detailed sequence alignments. Summaries of the effects of specific mutations on the function of the *E. coli* and yeast translocons are given in Smith et al., 2005, and Junne et al., 2006, respectively.

| Amino acid | Location | Figure  | yeast <sup>a</sup>          | Effect of mutation                        | Reference                  | Revised assignment <sup>3</sup>       |
|------------|----------|---------|-----------------------------|-------------------------------------------|----------------------------|---------------------------------------|
|            |          |         | <i>E. Coli</i> <sup>b</sup> |                                           |                            |                                       |
| D44        | TM1      | S1 I    | P40S <sup>b*</sup>          | SecY100                                   | Ito 1989<br>Smith 2005     |                                       |
| W59        | plug     | S1 J    | L66N <sup>a</sup>           | affects topology <sup>1</sup>             | Junne 2006                 | L53 <sup>b</sup><br>gap <sup>c</sup>  |
|            |          |         | F64C <sup>b</sup>           | prlA300<br>prlA300:open-plug <sup>2</sup> | Osborne 1993<br>Smith 2005 |                                       |
| Q60        | plug     | S1 J    | R67E <sup>a</sup>           | affects topology                          | Junne 2007                 |                                       |
| T63        | plug     | S1 J    | L70N <sup>a</sup>           | affects topology <sup>1</sup>             | Junne 2007                 |                                       |
| R66        | plug     | S1 I, J | A71D <sup>b</sup>           | prlA302                                   | Osborne 1993               | R57 <sup>b</sup><br>gap <sup>c</sup>  |
|            |          |         |                             | prlA302:open-plug <sup>2</sup>            | Smith 2005                 |                                       |
| T69        | plug     | S1 J    | S76F <sup>b</sup>           | secY125                                   | Taura 1994                 |                                       |
| T72        | TM2      | S1 J    | E79G <sup>a</sup>           | affects topology <sup>1</sup>             | Junne 2007                 |                                       |
| Q86        | TM2      | S1 A    | Q93R <sup>a</sup>           | affects topology <sup>1</sup>             | Junne 2007                 |                                       |
| K112       | TM3      | S1 D    | R121C                       | reduced functionality                     | Mori et al, 2004           |                                       |
| S151       | TM4      | S1 J    | S161T <sup>a</sup>          | affects topology <sup>1</sup> ; prl       | Junne 2007                 |                                       |
| D158       | TM4      | S1 D    | D168A <sup>a</sup>          | affects topology <sup>1</sup>             | Junne 2007                 |                                       |
|            |          |         | G175D <sup>b</sup>          | SecY104                                   | Taura 1994                 |                                       |
| E159       | TM4      | S1 D    | E176Q <sup>b</sup>          | affects translocation                     | van der Sluis 2006         |                                       |
|            |          |         | E176C <sup>b</sup>          | reduced functionality                     | Mori et al, 2004           |                                       |
| E227       | C4/TM6   | S1 F    | Q261R <sup>a</sup>          | affects topology <sup>1</sup>             | Junne 2007                 |                                       |
| K250       | TM7/C4   | S1 F    | K259E <sup>a</sup>          | prl<br>affects topology <sup>1</sup>      | Junne 2007                 |                                       |
| N256       | TM7      | S1 F    | V274G <sup>b</sup>          | prlA1                                     | Emr 1981, Osborne<br>1993  |                                       |
|            |          |         |                             | prlA1: CS stable <sup>2</sup>             | Smith 2005                 |                                       |
| N268       | TM7      | S1 F    | F286Y                       | restores translocation in I408N           | Duong & Wickner 1999       |                                       |
| W272       | TM7      | S1 G    | I290T <sup>b</sup>          | secY121                                   | Sako 1991                  | gap <sup>b</sup><br>I183 <sup>c</sup> |
| F333       | TM8      | S1 A    | T379I                       | affects topology <sup>1</sup>             | Junne 2007                 |                                       |
| E336       | TM8      | S1 A    | E382R <sup>a</sup>          | affects topology <sup>1</sup>             | Junne 2007                 |                                       |
| E416       | TM10     | S1 F    | E460K                       | affects topology <sup>1</sup>             | Junne 2007                 |                                       |

<sup>1</sup>June et al., 2007 assessed the effect of mutating specific residues on the membrane protein topology by measuring the efficiency of translocation of substrates with different charge distributions of the signal anchors.

<sup>2</sup>Smith et al., 2005 categorized the prl suppressor mutations with respect to their mechanism. Two classes of prlA suppressor mutations are open-ring stabilization (e.g., prlA300 and prlA302), and closed-state (CS) destabilization (e.g., prlA1). sec phenotypes are nonfunctional under restrictive conditions; in contrast, prl phenotypes expand the translocation function of SecY/SecE1 to substrates with mutant/absent signal peptides.

<sup>3</sup>Revised correspondence of amino acids from the sequences of *M. janaaschii*, *E. coli*, and *S. cerevisiae* based on the sequence alignment from Figure S6.

<sup>a</sup>The sequence of *S. cerevisiae*.

<sup>b</sup>The sequence of *E. coli*.

(\*) The mutation effect is caused by a multiple mutation.

**Table S4.** The organism names and Pfam access codes for all SecY archaeal sequence alignments of Figure S12.

| <b>Accnr</b>           | <b>Organism</b>                                                           |
|------------------------|---------------------------------------------------------------------------|
| SECY_METJA             | <i>Methanococcus jannaschii</i> :                                         |
| 3din_F_PDB_sequence    | <i>Methanococcus jannaschii</i> :                                         |
| tr A3MUZ2 A3MUZ2_PYRCJ | <i>Pyrobaculum calidifontis</i>                                           |
| tr A4FVU0 A4FVU0_METS5 | <i>Methanococcus maripaludis</i>                                          |
| tr A5UL65 A5UL65_METS3 | <i>Methanobrevibacter smithii</i>                                         |
| tr A6UQ67 A6UQ67_METVS | <i>Methanococcus vannielii</i>                                            |
| tr A6UWW1 A6UWW1_META3 | <i>Methanococcus aeolicus</i>                                             |
| SECY_METJA             | <i>Methanococcus jannaschii</i> :                                         |
| Q9YDD0                 | <i>Aeropyrum_pernix</i>                                                   |
| Q9V1V8                 | <i>Pyrococcus_abyssi</i>                                                  |
| Q9UX84                 | <i>Sulfolobus_solfataricus</i>                                            |
| Q9HPB1                 | <i>Halobacterium_salinarum</i>                                            |
| Q9HIT0                 | <i>Thermoplasma_acidophilum</i>                                           |
| Q97BV3                 | <i>Thermoplasma_volcanium</i>                                             |
| Q977V3                 | <i>Haloferax_volcanii</i>                                                 |
| Q8ZT51                 | <i>Pyrobaculum_aerophilum</i>                                             |
| Q8X258                 | <i>Haloferax_volcanii</i>                                                 |
| Q8U019                 | <i>Pyrococcus_furiosus</i>                                                |
| Q8TZA9                 | <i>Methanopyrus_kandleri</i>                                              |
| Q8TRS4                 | <i>Methanosarcina_acetivorans</i>                                         |
| Q8PV27                 | <i>Methanosarcina_mazei</i>                                               |
| Q74NB9                 | <i>Nanoarchaeum_equitans</i>                                              |
| Q6LXD0                 | <i>Methanococcus_maripaludis</i>                                          |
| Q6L1A4                 | <i>Picrophilus_torridus</i>                                               |
| Q673Q5                 | <i>uncultured_marine_group_II_euryarchaeote_DeepAnt-JyK</i>               |
| Q60175                 | <i>Methanocaldococcus_jannaschii</i>                                      |
| Q5JJH1                 | <i>Thermococcus_kodakarensis_KOD1</i>                                     |
| Q46GB8                 | <i>Methanosarcina_barkeri_str._Fusaro</i>                                 |
| Q3IMW5                 | <i>Natronomonas_pharaonis_DSM_2160</i>                                    |
| Q2QAQ7                 | <i>uncultured_marine_group_II_euryarchaeote_HF70_59C08</i>                |
| Q2NFY0                 | <i>Methanosphaera_stadtmanae_DSM_3091</i>                                 |
| Q2FSG8                 | <i>Methanospirillum_hungatei_JF-1</i>                                     |
| Q2EMT2                 | <i>Methanococcus_voltae</i>                                               |
| Q18GH2                 | <i>Haloquadratum_walsbyi_DSM_16790</i>                                    |
| Q12ZS8                 | <i>Methanococcoides_burtonii_DSM_6242</i>                                 |
| Q0W1W5                 | <i>uncultured_methanogenic_archaeon</i>                                   |
| P28541                 | <i>Methanococcus_vannielii</i>                                            |
| P28542                 | <i>Haloarcula_marismortui</i>                                             |
| P49978                 | <i>Sulfolobus_acidocaldarius</i>                                          |
| O26134                 | <i>Methanothermobacter_thermautotrophicus_str._Delta_H</i>                |
| O28377                 | <i>Archaeoglobus_fulgidus</i>                                             |
| O59442                 | <i>Pyrococcus_horikoshii</i>                                              |
| A8CHN0                 | <i>Methanococcus_maripaludis</i>                                          |
| A8ABS3                 | <i>Ignicoccus_hospitalis</i>                                              |
| A7I5R2                 | <i>Methanoregula_boonei_(strain_6A8)</i>                                  |
| A7DRN9                 | <i>Candidatus_Nitrosopumilus_maritimus_SCM1</i>                           |
| A7D110                 | <i>Halorubrum_lacusprofundi_ATCC_49239</i>                                |
| A6VH08                 | <i>Methanococcus_maripaludis_(strain_C7_/ATCC_BAA-1331)_GN=MmarC7</i>     |
| A6UWW1                 | <i>Methanococcus_aeolicus_(strain_Nankai-3_/ATCC_BAA-1280)_GN=Maeo</i>    |
| A6UQ67                 | <i>Methanococcus_vannielii_(strain_SB_/ATCC_35089_/DSM_1224)_GN=Mevan</i> |
| A5UL65                 | <i>Methanobrevibacter_smithii_(strain_PS_/ATCC_35061_/DSM_861)_GN=Msm</i> |
| A4YCY9                 | <i>Metallosphaera_sedula</i>                                              |
| A4WM08                 | <i>Pyrobaculum_arsenaticum</i>                                            |
| A4FVU0                 | <i>Methanococcus_maripaludis_(strain_C5_/ATCC_BAA-1333)_GN=MmarC5</i>     |
| A3MUZ2                 | <i>Pyrobaculum_calidifontis_(strain_JCM_11548_/VA1)_GN=Pcal</i>           |
| A3H5A9                 | <i>Caldivirga_maquilingensis_IC-167</i>                                   |
| A3DND0                 | <i>Staphylothermus_marinus</i>                                            |
| A2SPM5                 | <i>Methanocorpusculum_labreanum</i>                                       |
| A2BME2                 | <i>Hyperthermus_butylicus</i>                                             |
| A1RWR3                 | <i>Thermofilum_pendens_(strain_Hrk_5)_GN=Tpen</i>                         |
| A1RT58                 | <i>Pyrobaculum_islandicum</i>                                             |
| A0RUE4                 | <i>Cenarchaeum_symbiosum</i>                                              |
| A0B9U7                 | <i>Methanosaeta_thermophila</i>                                           |

## Protocol for sequence analysis.

The initial list of SecY proteins was compiled using the PFAM database (Finn et al., 2008) Hidden Markov Model (HMM) PF00344 for SecY, which has a coverage of 78 % of the full-length sequences.

SecY PFAM model offers a hand curated seed alignment of 17 reference sequences. The seed SecY alignment HMM (Durbin et al., 1999) is used to generate a full alignment, which are all related sequences with score higher than the manually set threshold values for the HMMs of a particular PFAM entry (Eddy et al, 2001), in this case the SecY family. We used the sequences selected by those models with the best scores for further analysis. The full alignment contained 1154 sequences from all Phyla and is not hand curated.

The sequences were then divided in three groups: archeas, bacteria and eukaryotes. To create the definitive full-length alignments we used T-coffee (Notredame et al., 2000), which allows aligning with good accuracy, profiles, structures and individual sequences. Resulting full-length analysis were manually inspected.

Conservation analysis, paying special attention to the conservation of hydrophobicity was generated following the color scheme from Kyte and Doolittle (Kyte and Doolittle, 1982). According to this scheme, the most hydrophobic residues are colored in red, and the most hydrophilic residues in blue. Tables with the frequencies of the amino acids were generated from the alignments for each important position in the alignment indicating with the Kyte & Doolittle color scheme if the hydrophobic/hydrophilic properties for a certain position are conserved.

Alignment figures and modifications were made using Jalview (Clamp et al., 2004), a Java multiple alignment editor and analysis tool. The amino acid histogram representation for each position in the alignment was performed using a java implementation of LogoBar (Perez-Bercoff et al., 2006)

## Supplementary References

Finn, R.D., Tate, J., Mistry, J., Coghill, P.C., Sammut, J.S., Hotz, H.R., Ceric, G., Forslund, K., Eddy, S.R., Sonnhammer, E.L., and Bateman, A. (2008). Nucleic Acids Research Database Issue 36: D281-D288.

Duong, F., and Wickner, W. (1999). The prlA and prlG phenotypes are caused by a loosened association among the translocase SecYEG subunits. EMBO J. 18: 3263-3270.

Durbin, R., Eddy, S.R., Krogh, A., and Mitchison, G. (1999). Biological Sequence Analysis: Probabilistic Models of Proteins and Nucleic Acids. Cambridge University Press. ISBN 0-521-62971-3.

Eddy, S.R. (2001). HMMER User's Guide: Biological sequence analysis using profile hidden Markov models, version 2.2. Washington University School of Medicine, 2001.

Emr, S. D., Hanley-Way, S., and Silhavy, T. J. (1981). Suppressor mutations that restore export of a protein with a defective signal sequence. Cell 23: 79-88.

Notredame C, Higgins DG, Heringa J.T-Coffee: A novel method for fast and accurate multiple sequence alignment. J Mol Biol. 2000 Sep 8;302(1):205-17.

Kyte, J., and Doolittle, R.F., J. Mol. Biol. 1157, 105-132, 1982.

Pérez-Bercoff, Å., Koch, J. and Bürglin, T.R. (2006) LogoBar: bar graph visualization of protein logos with gaps. Bioinformatics, 22, 112-114.

- Clamp, M., Cuff, J., Searle, S. M. and Barton, G. J. (2004), The Jalview Java Alignment Editor, *Bioinformatics*, 20, 426-7.
- Ito, K., Hirota, Y., and Akiyama, Y. (1989). Temperature-sensitive *sec* mutants of *Escherichia coli*: inhibition of protein export at permissive temperatures. *J. Bacteriol.* 171: 1742-1743.
- Junne, T., Schwede, T., Goder, V., and Spiess, M. (2007). Mutations in the Sec61p channel affecting signal sequence recognition and membrane topology. *J. Biol. Chem.* 282: 33201-33209.
- Mori, H. Shimokawa, N., Satoh, Y., and Ito, K. (2004). Mutational analysis of transmembrane regions 3 and 4 of SecY, a central component of protein translocase. *J. Bacteriol.* 186: 3960-3969.
- Osborne, R. S., and Silhavy, T. J. (1993). PrlA suppressor mutations cluster in regions corresponding to three distinct topological domains. *EMBO J.* 12: 3391-3398.
- Sako, T. (1991). Novel *prlA* alleles defective in supporting staphylokinase processing in *Escherichia coli*.
- Smith, M. A., Clemons, W. M., DeMars C. J., and Flower, A. M. (2005) Modeling the effects of prl mutations on the *Escherichia coli* SecY complex. *J. Bacteriol.* 187, 6454-6465
- Taura, T., Akiyama, Y., and Ito, K. (1994). Genetic analysis of SecY: additional export-defective mutations and factors affecting their phenotype. *Mol. Gen. Genet.* 243: 261-269.
- Tsukazaki, T., Mori, H., Fukai, S., Ishitani, R., Mori, T., Dohmae, N., Prederina, A., Sugita, Y., Vassylyev, D. G., Ito, K., and Nureki, O. (2008). Conformational transition of Sec machinery inferred from bacterial SecYE structures. *Nature* 455: 988-991.
- Van den Berg, B., Clemons, W.M., Jr., Collinson, I., Modis, Y., Hartmann, E., Harrison, S.C., and Rapoport, T.A. (2004). X-ray structure of a protein-conducting channel. *Nature* 427, 36-44.
- Van der Sluis, E. O., Nouwen, N., Koch, J., de Keyzer, J., van der Does, C., Tampé, R., and Driessen, A. J. M. (2006). Identification of two interaction sites in SecY that are important for the functional interaction with SecA. *J. Mol. Biol.* 361: 839-849.
- Zimmer, J., Nam, Y., and Rapoport, T. A. (2008). Structure of a complex of the ATPase SecA and the protein-translocation channel. *Nature* 455: 936-943.
